# Supplementary material
Source: publisher figshare collection journal article supplement (https://gsajournals.figshare.com/articles/dataset/_/15043521)

# *SQANTI3 report*

*Unique Genes: 7486*  
*Unique Isoforms: 16160*

*Gene classification*

| <b>Category</b> | <b># Genes</b> |
|-----------------|----------------|
| Annotated Genes | 6487           |
| Novel Genes     | 999            |

*Characterization of transcripts  
based on splice junctions*

| <b>Category</b>  | <b># Isoforms</b> |
|------------------|-------------------|
| FSM              | 12252             |
| ISM              | 2299              |
| NIC              | 244               |
| NNC              | 228               |
| Genic<br>Genomic | 116               |
| Antisense        | 196               |
| Fusion           | 0                 |
| Intergenic       | 825               |
| Genic<br>Intron  | 0                 |

*Splice Junction Classification*

| <b>Category</b>     | <b># SJs</b> | <b>Percent</b> |
|---------------------|--------------|----------------|
| Known canonical     | 47582        | 95.66          |
| Known Non-canonical | 1489         | 2.99           |
| Novel canonical     | 426          | 0.86           |
| Novel Non-canonical | 243          | 0.49           |

## *Gene Characterization*

Number of Isoforms per Gene

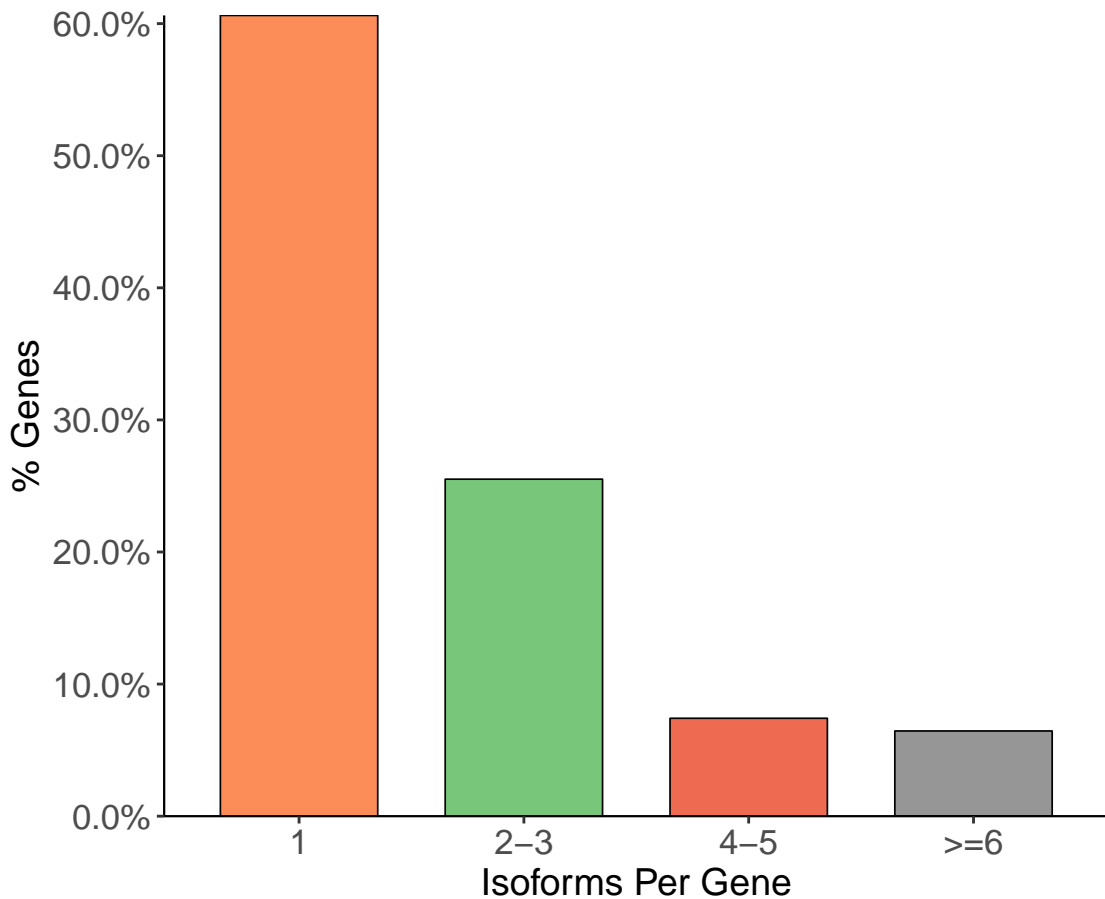

Number of Isoforms per Gene, Known vs Novel Genes

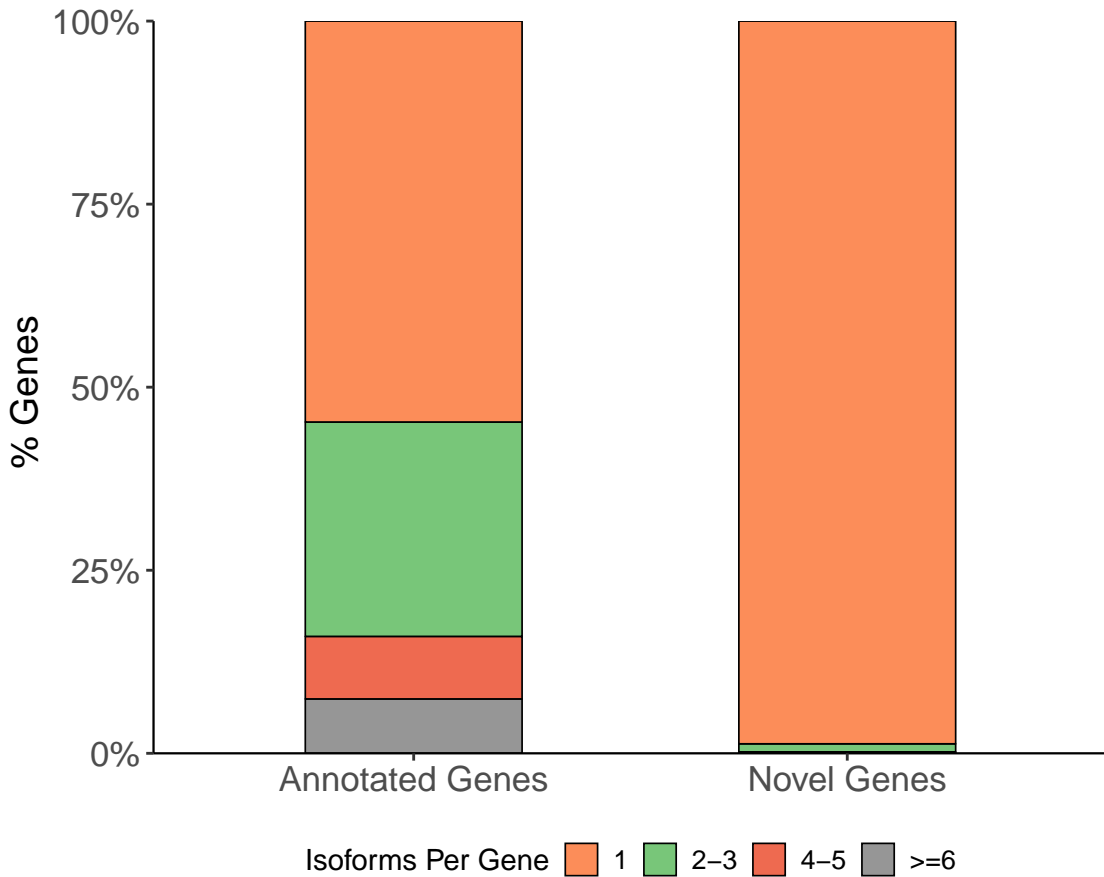

Distribution of Mono- vs Multi-Exon Transcripts

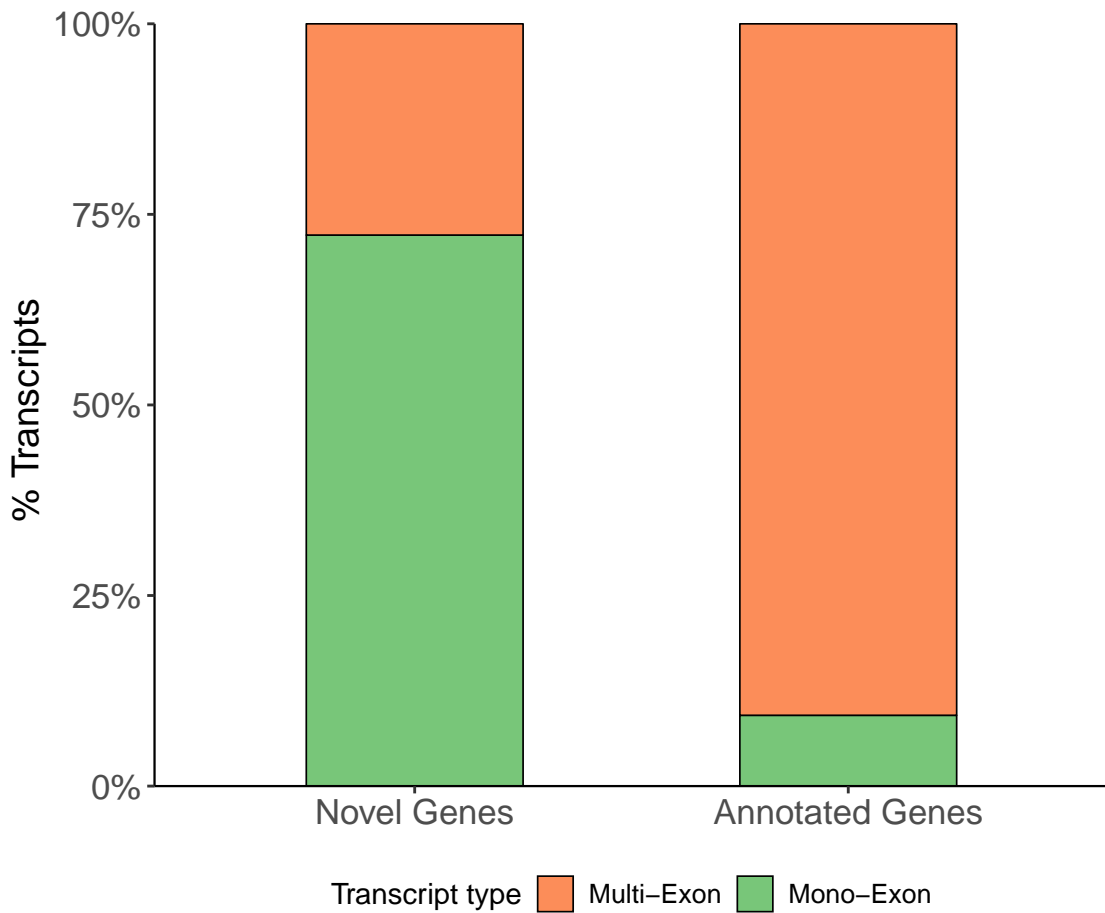



Classifications by Transcript Length, normalized

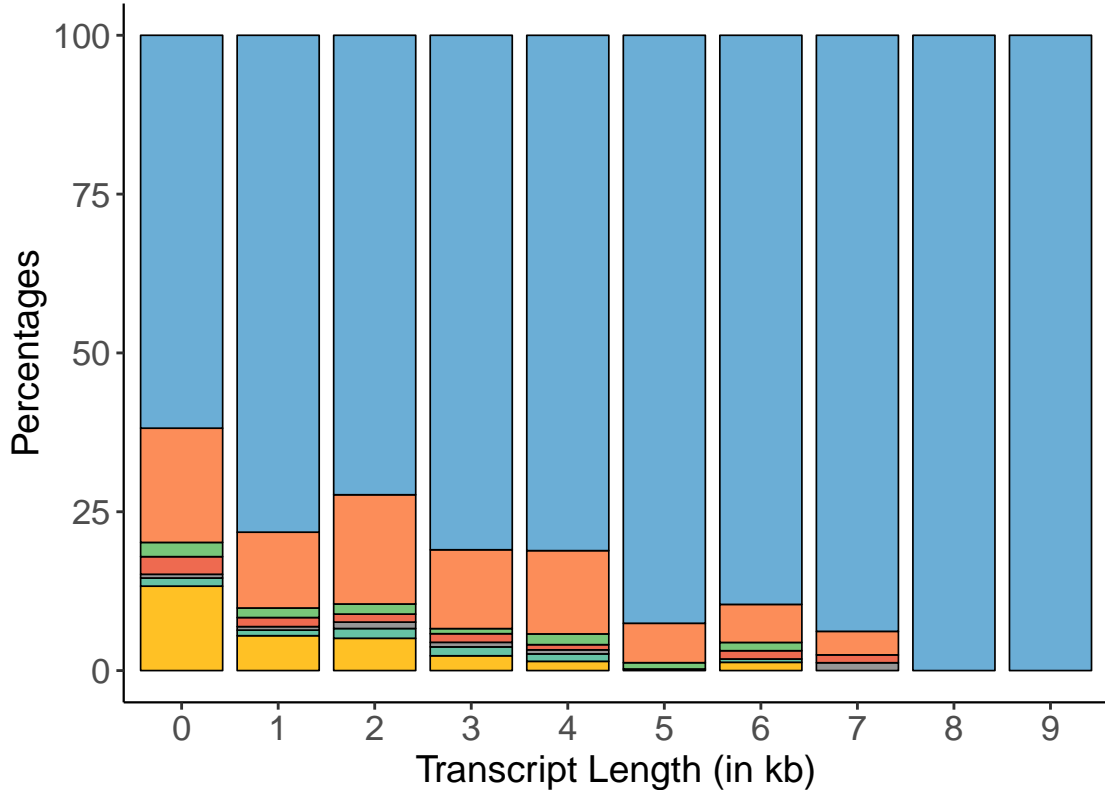

Structural Category

|                                                                                         |                                                                                         |                                                                                                   |                                                                                                 |
|-----------------------------------------------------------------------------------------|-----------------------------------------------------------------------------------------|---------------------------------------------------------------------------------------------------|-------------------------------------------------------------------------------------------------|
|  FSM |  NIC |  Genic Genomic |  Intergenic |
|  ISM |  NNC |  Antisense     |                                                                                                 |



Transcript Lengths, all transcripts

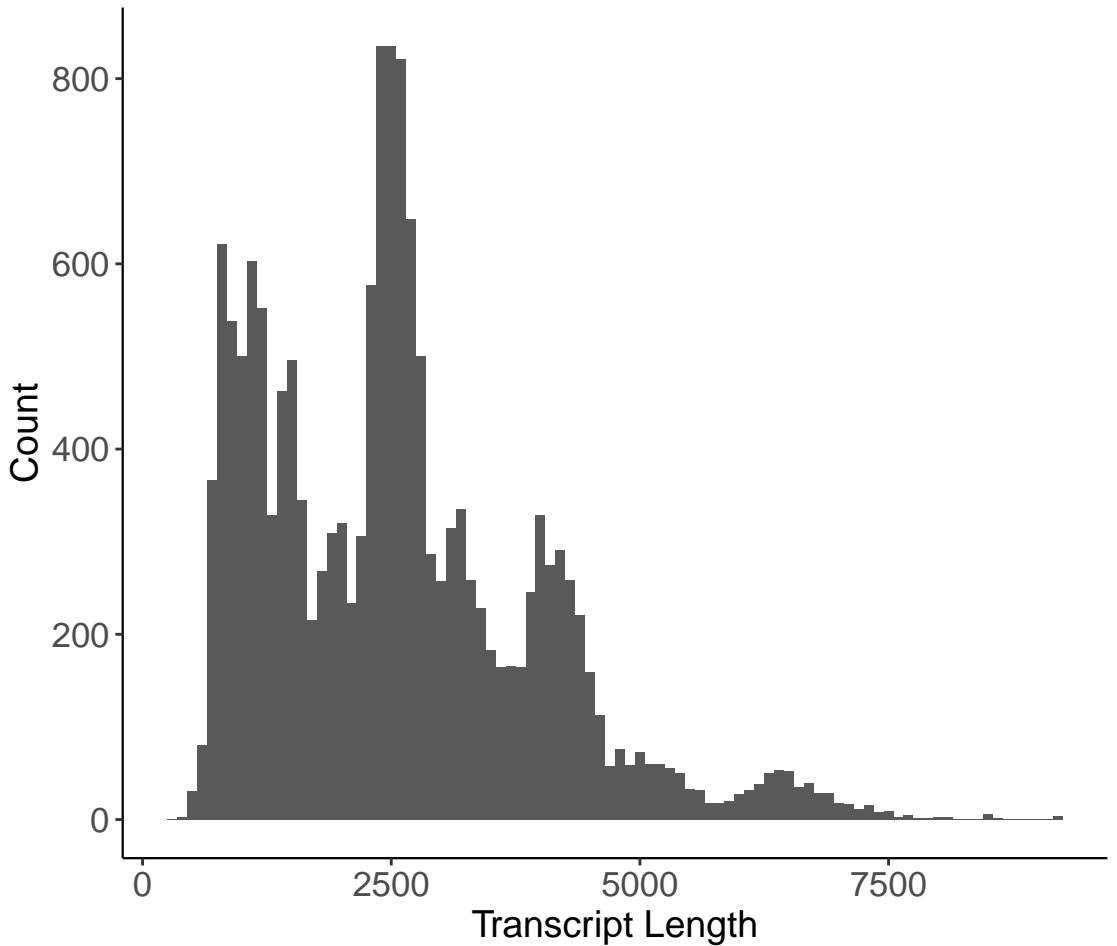

Transcript Lengths, by structural category

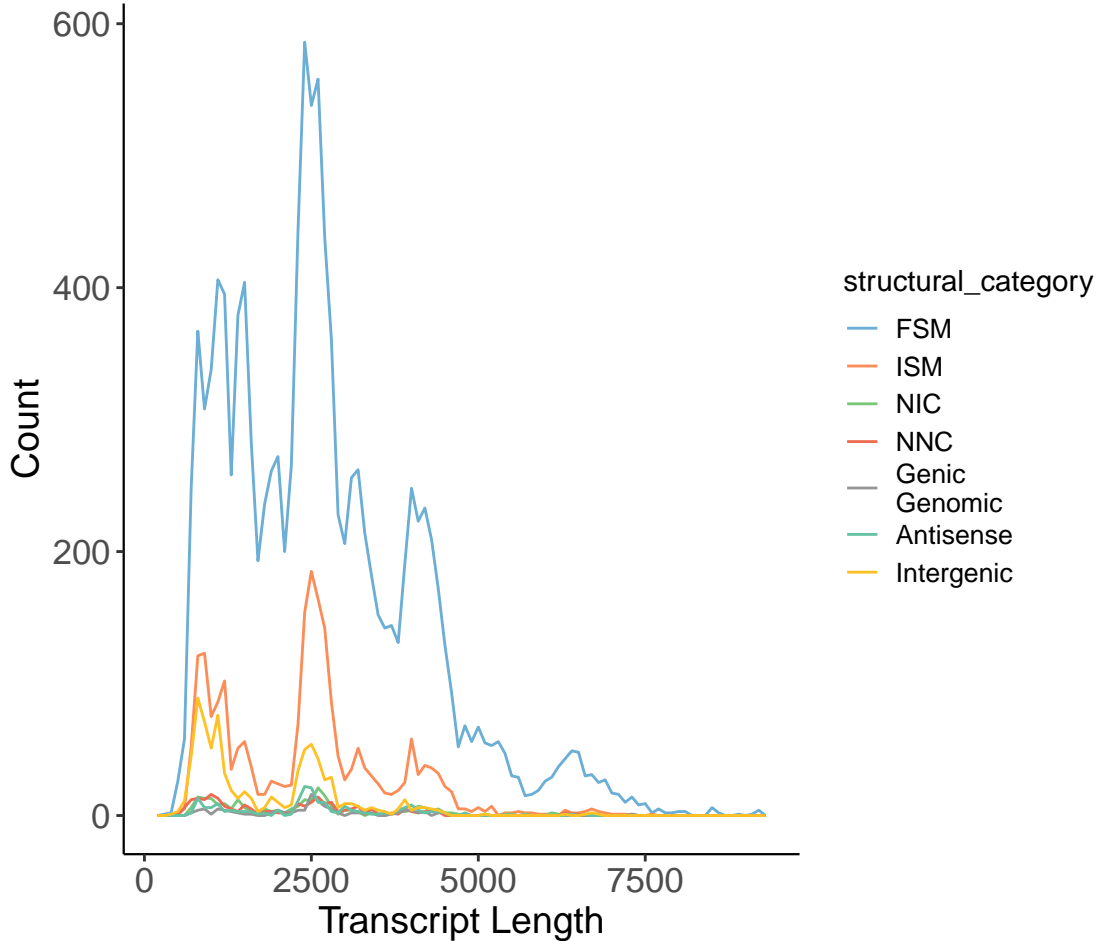

Transcript Lengths, Mono- vs Multi-Exons

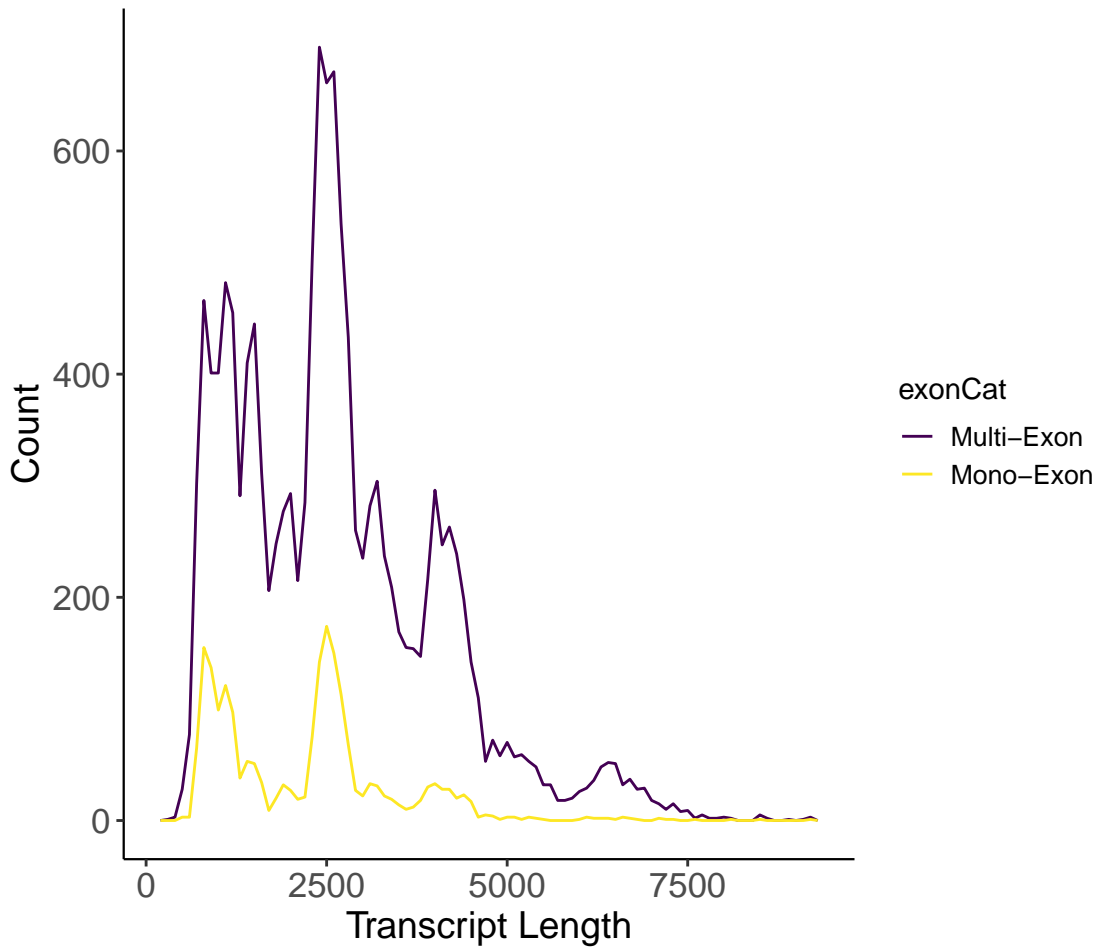

*Structural Isoform Characterization  
by Splice Junctions*

## Isoform distribution across structural categories

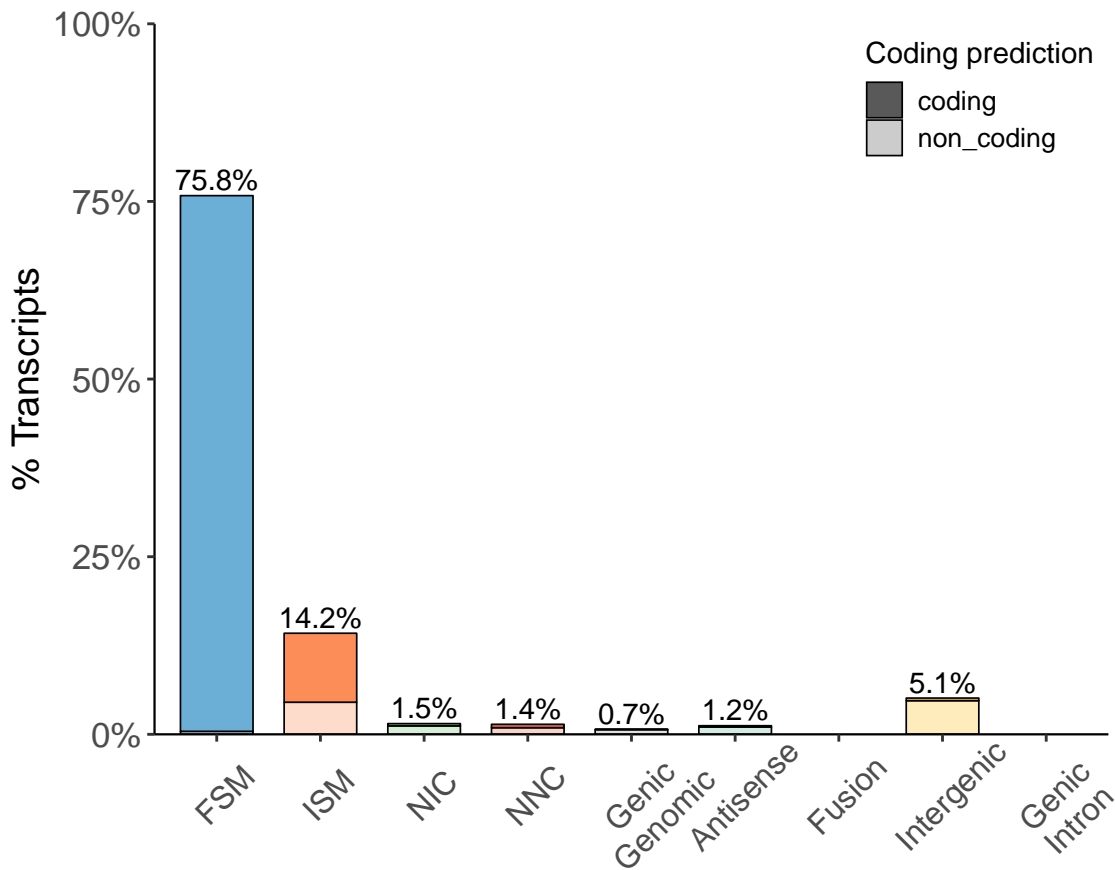

Transcript Lengths by Structural Classification

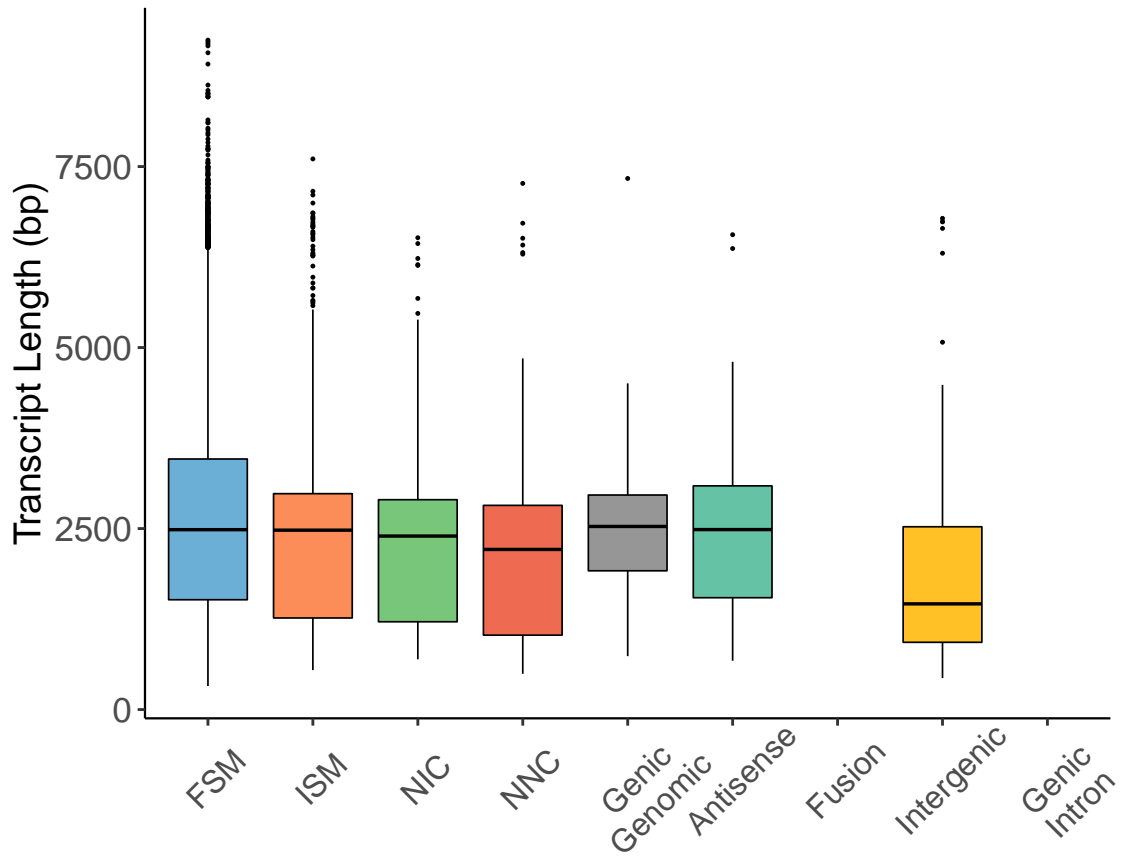

# Exon Counts by Structural Classification

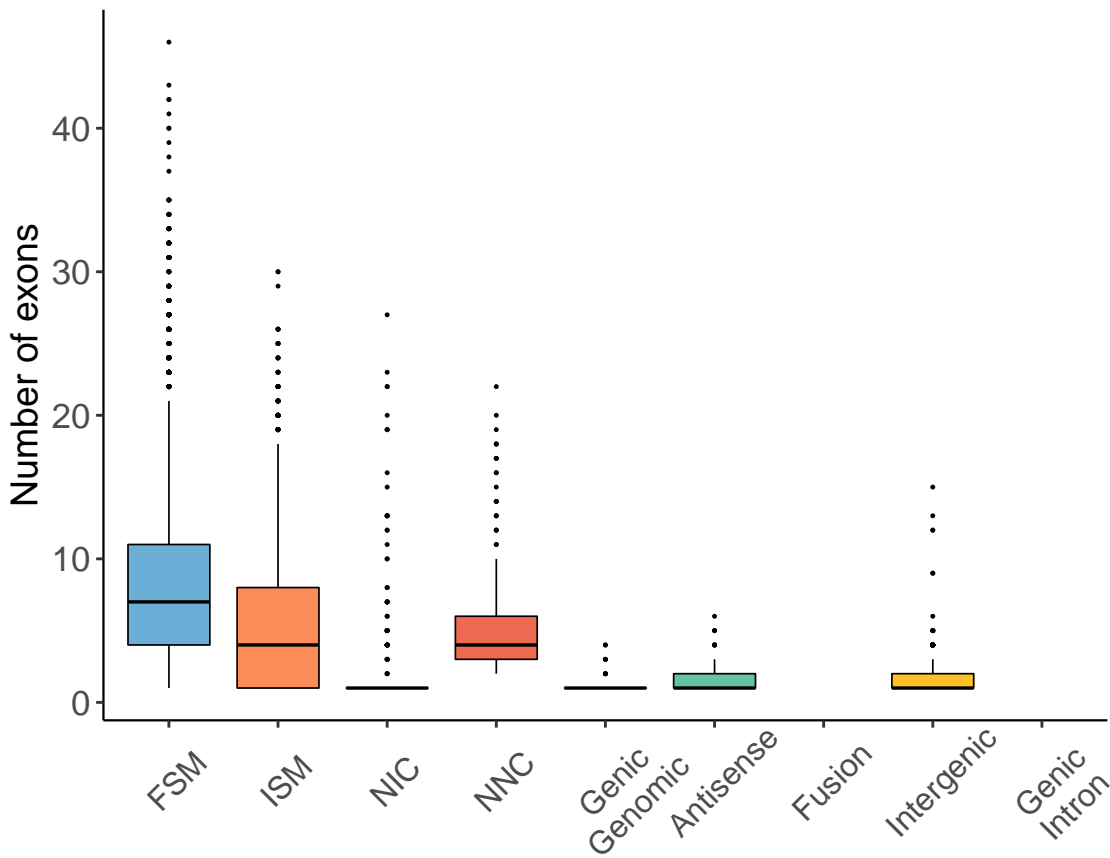

# Length Distribution of Matched Reference Transcripts

Applicable only to FSM and ISM categories

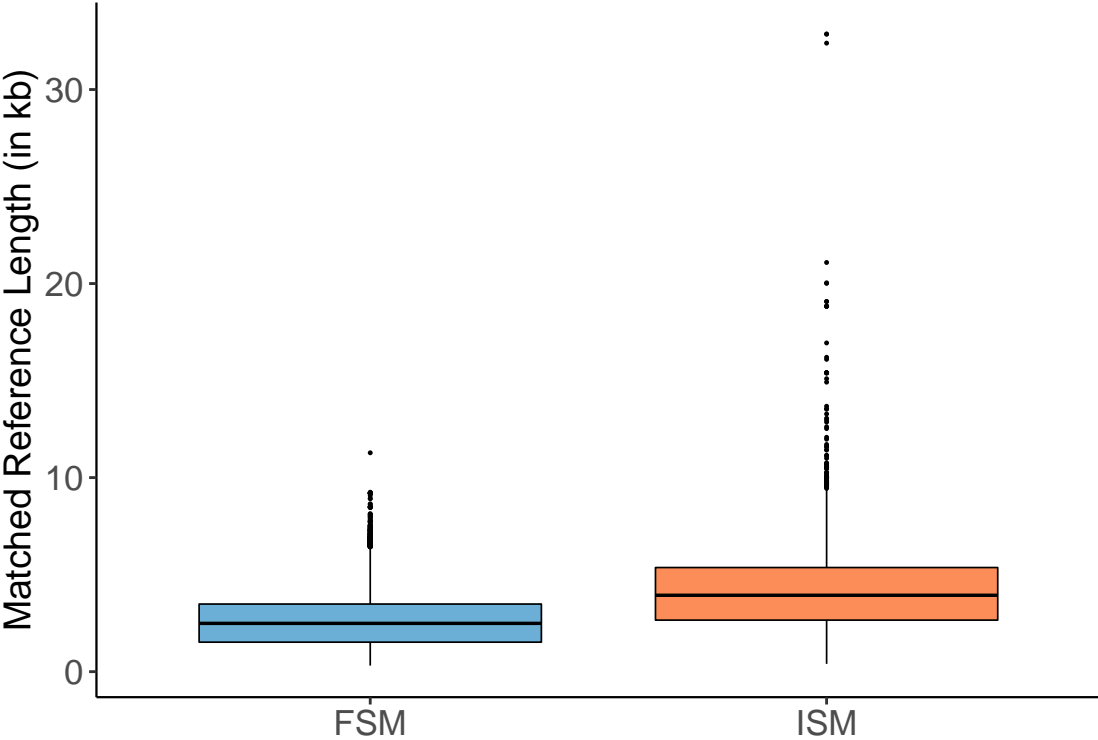



# Exon Count Distribution of Matched Reference Transcripts

Applicable only to FSM and ISM categories

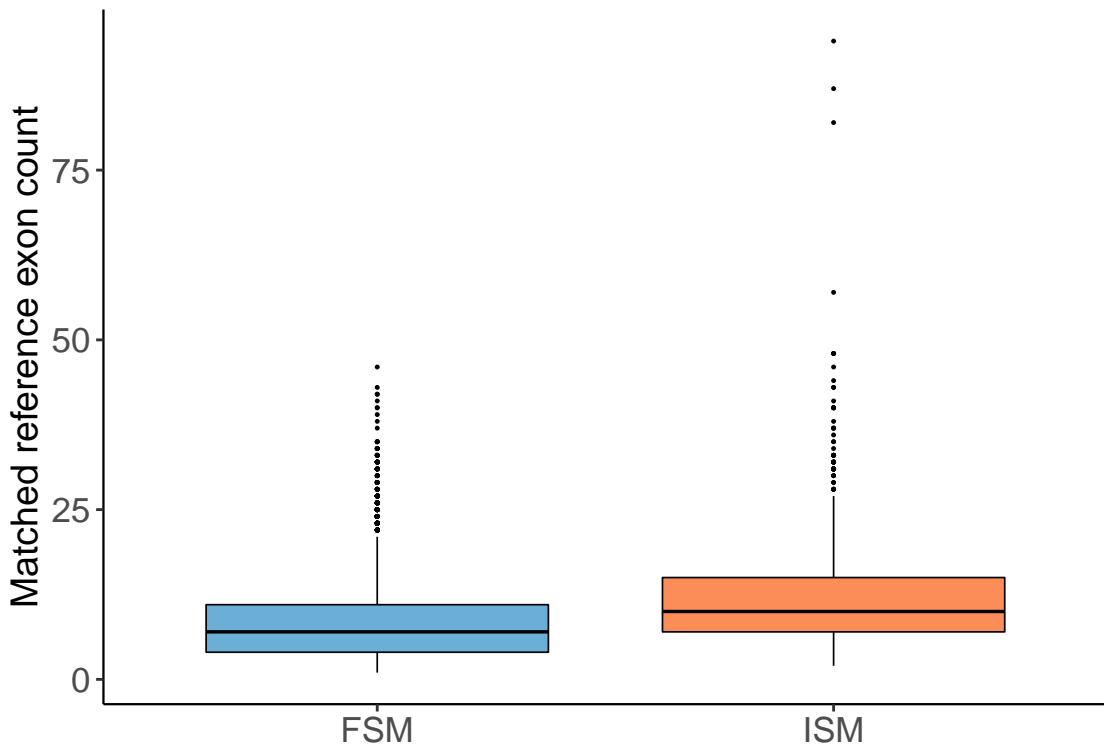

## *Splice Junction Characterization*

### Distribution of Splice Junctions by Structural Classification

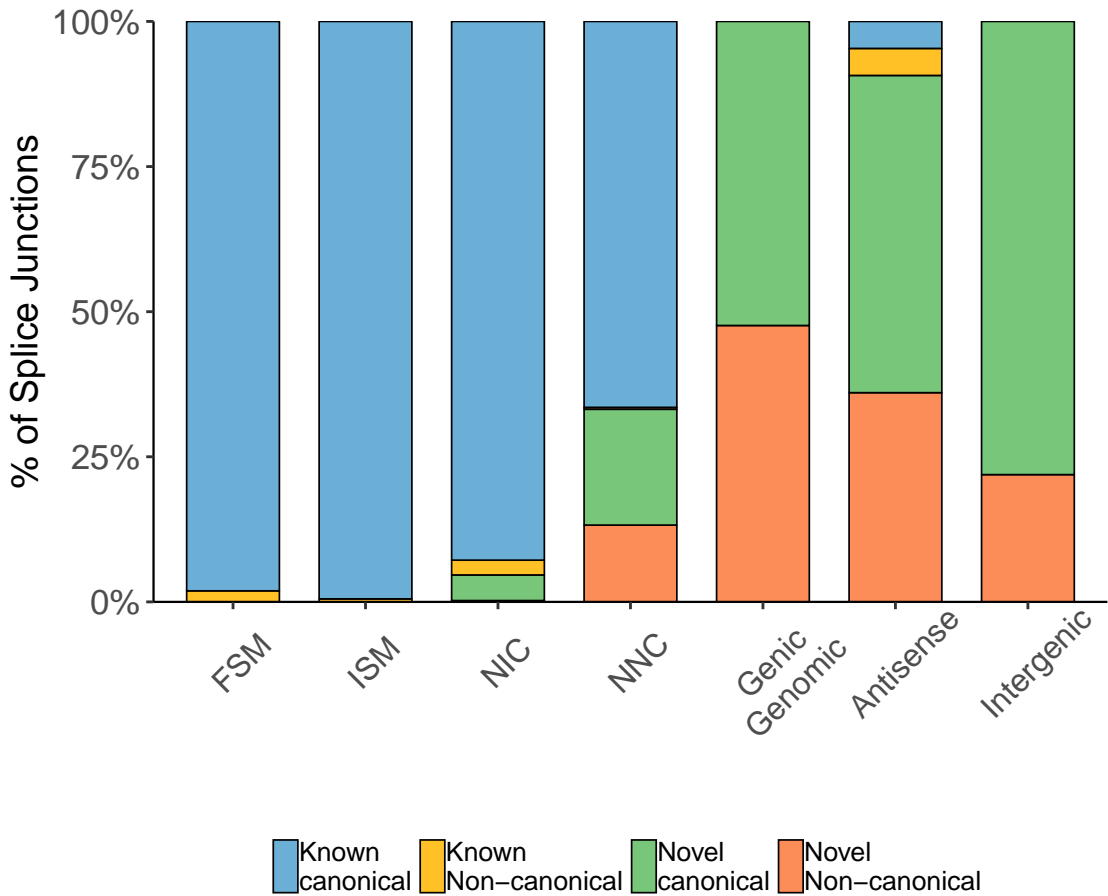

## Distribution of Transcripts by Splice Junctions

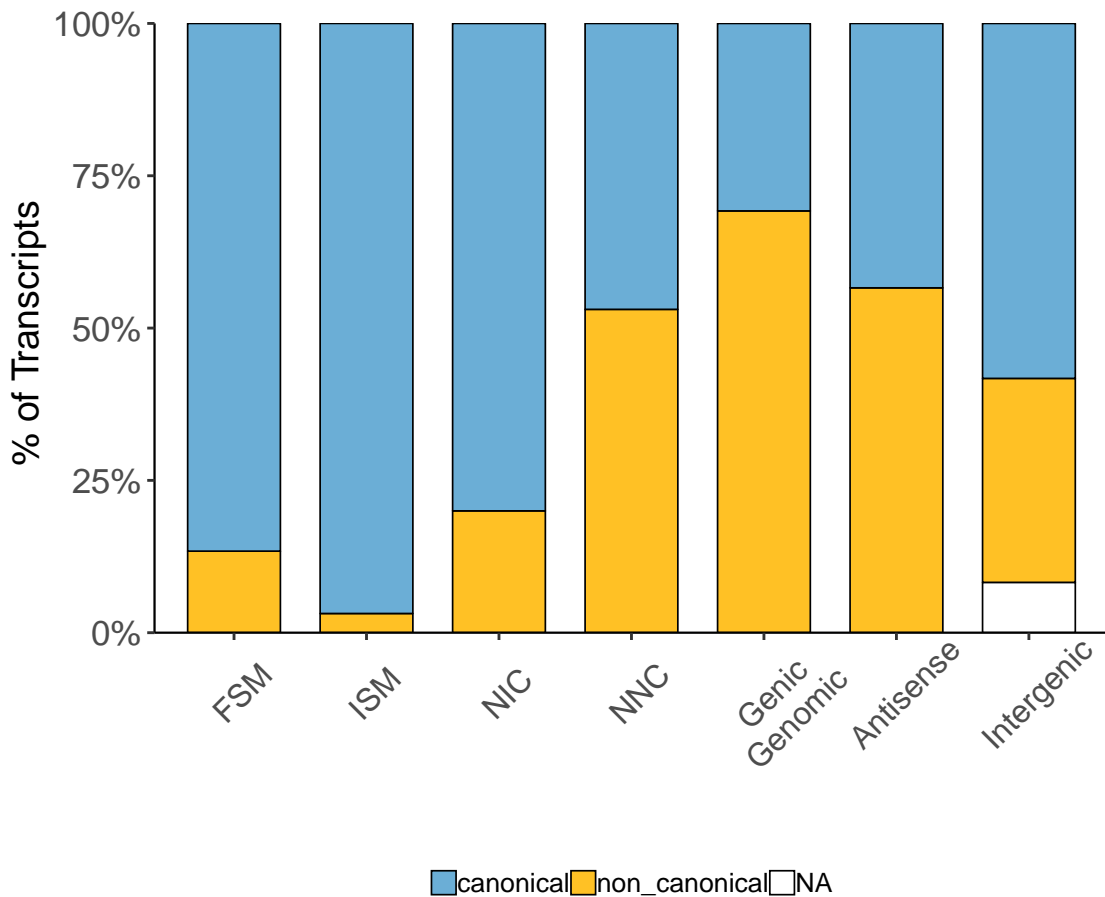

# RT-switching, all junctions

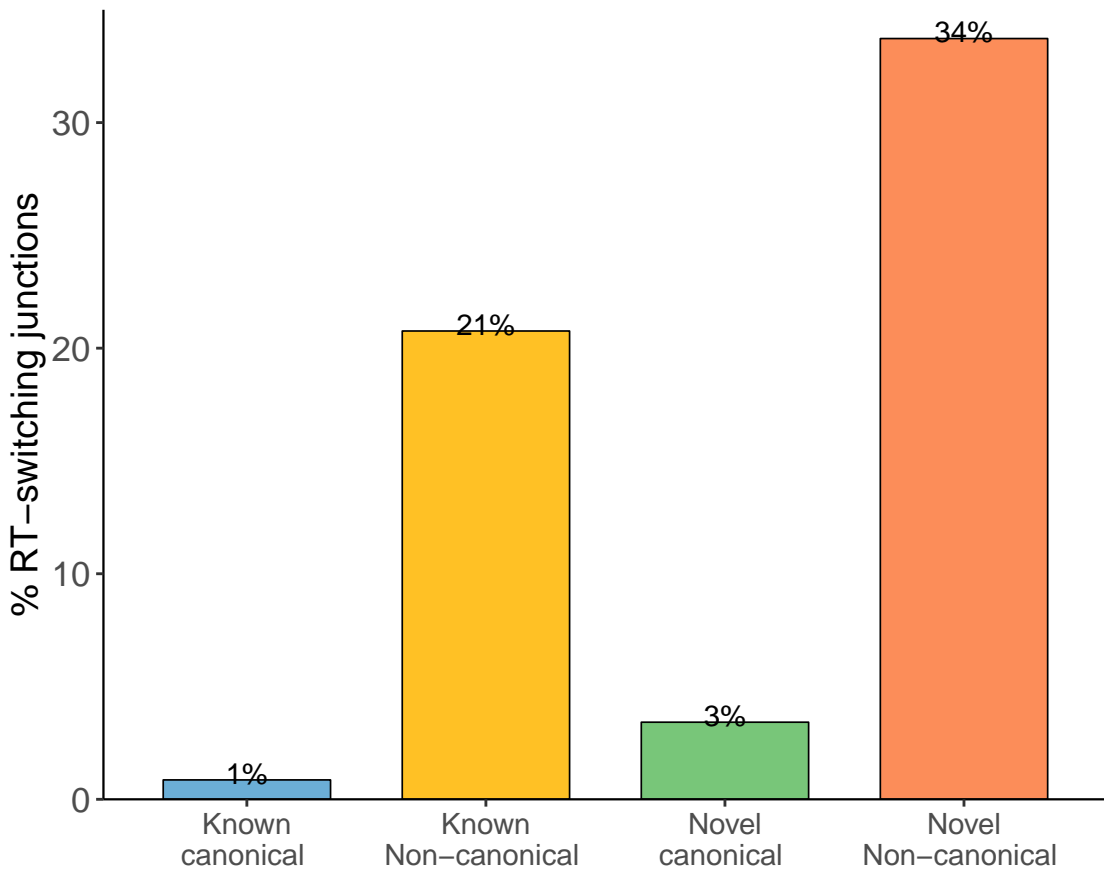

### RT-switching, unique junctions

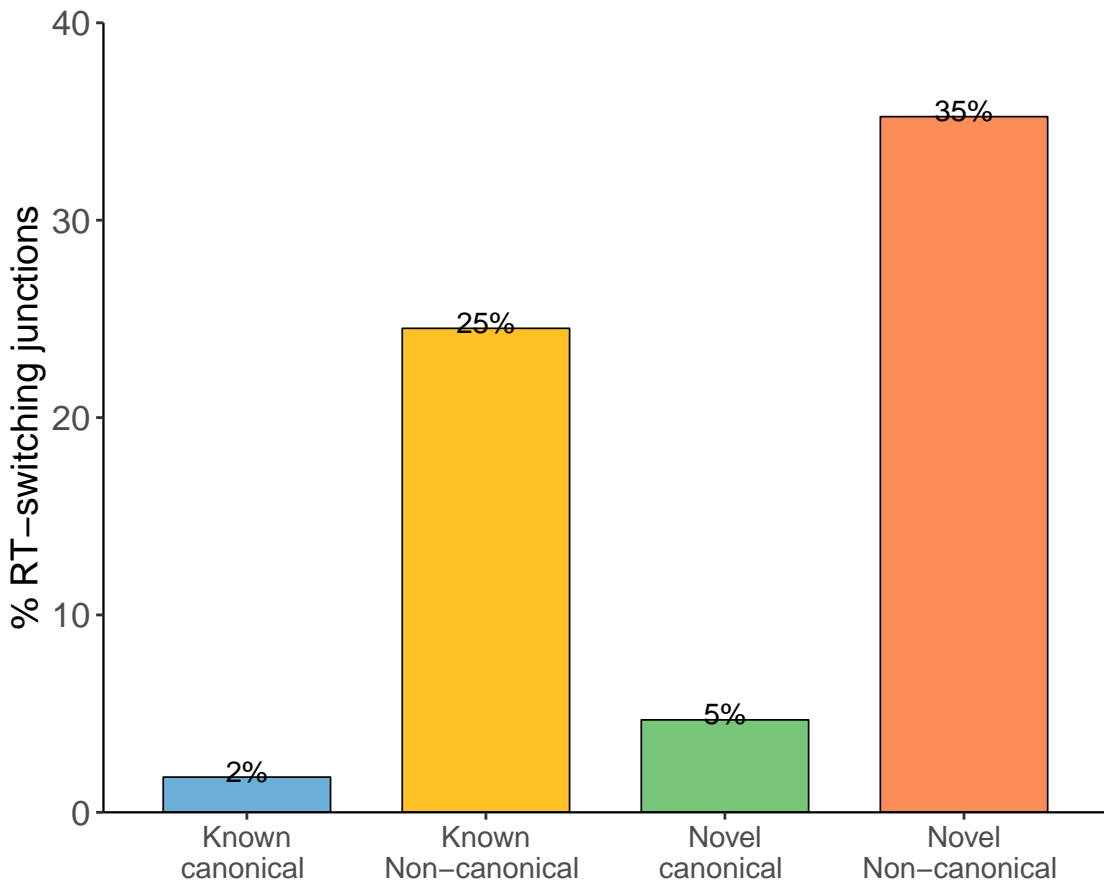

*Comparison with Annotated TSS and PolyA Sites*

# Distance to Annotated Polyadenylation Site, FSM only

Negative values indicate upstream of annotated polyA site

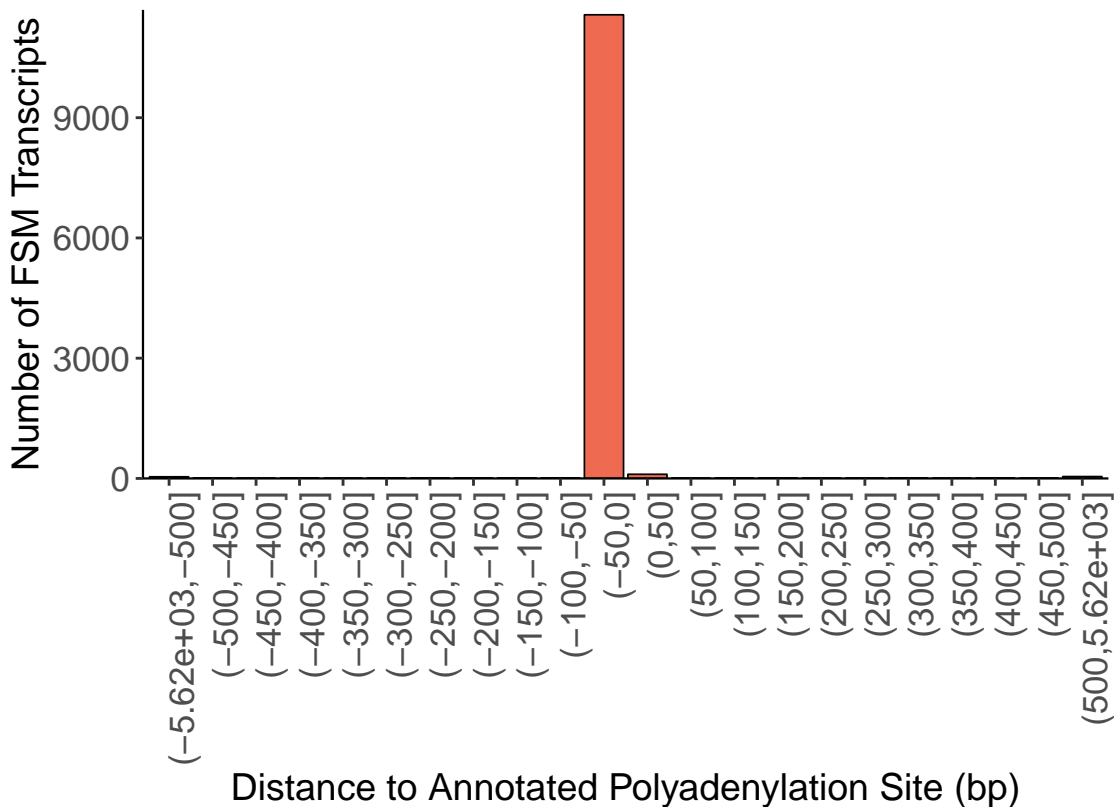



# Distance to Annotated Polyadenylation Site, FSM only

Negative values indicate upstream of annotated polyA site

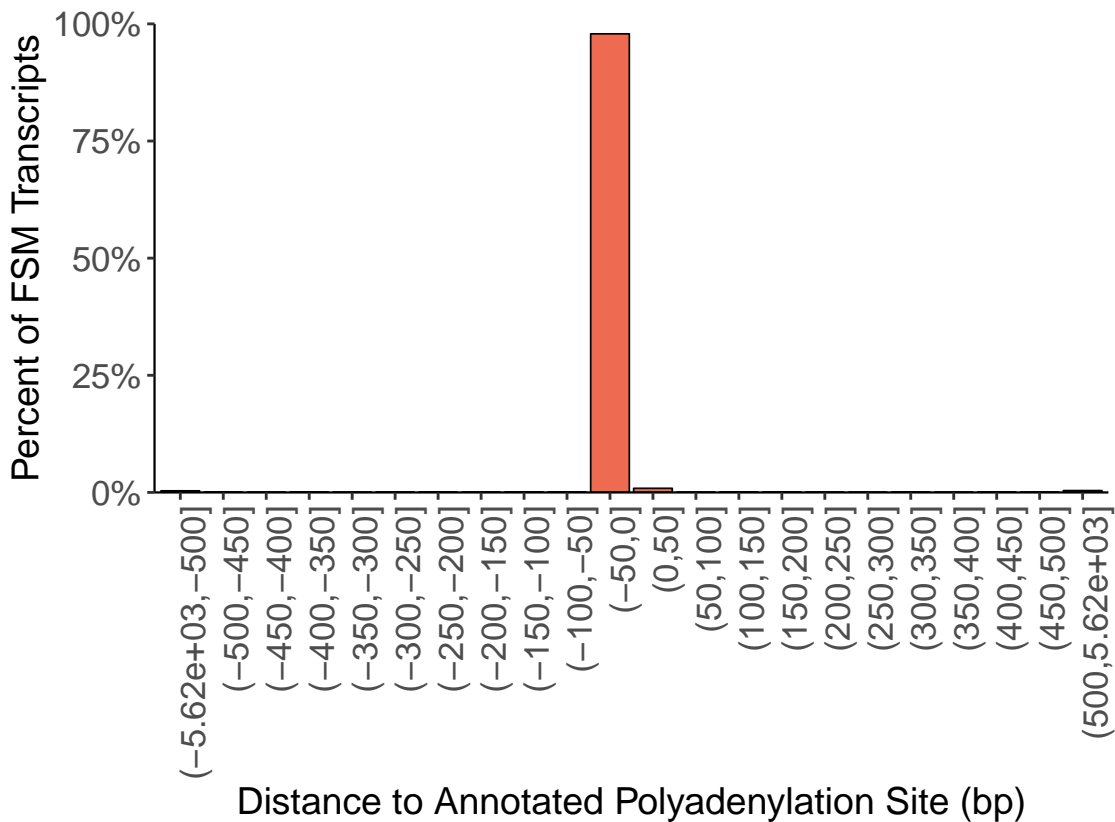

# Distance to Annotated Transcription Start Site, FSM only

Negative values indicate downstream of annotated TSS

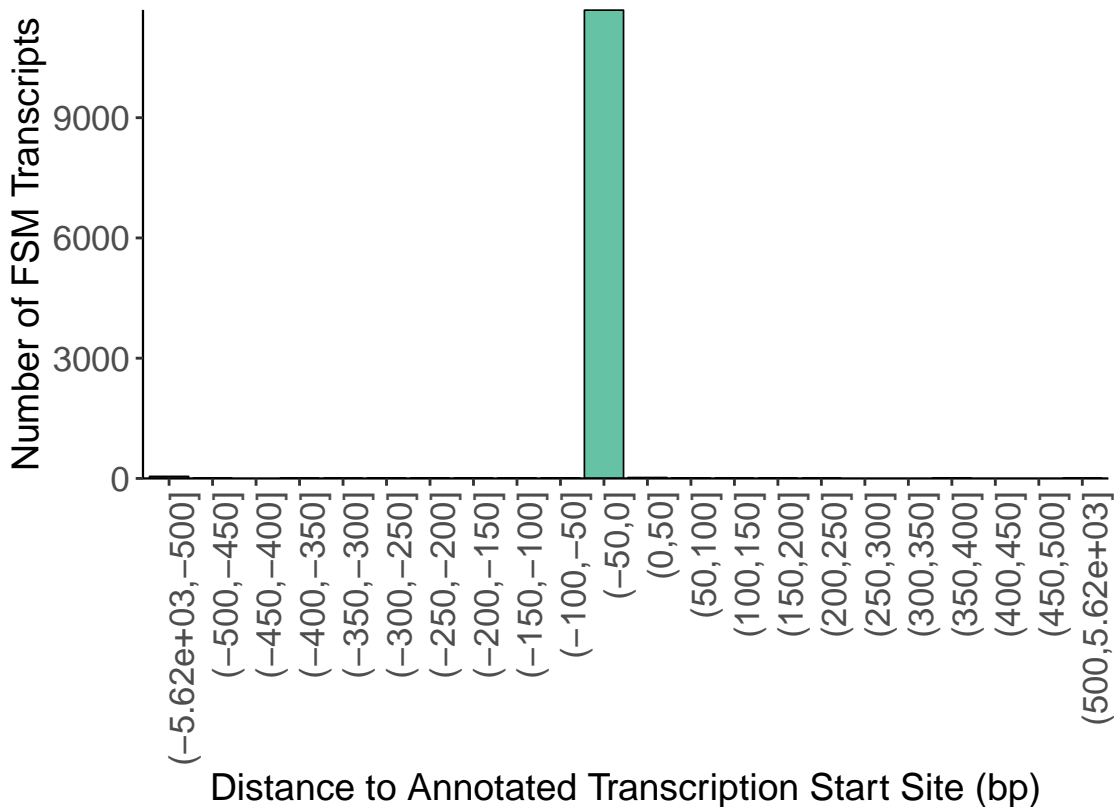

# Distance to Annotated Transcription Start Site, FSM only

Negative values indicate downstream of annotated TSS

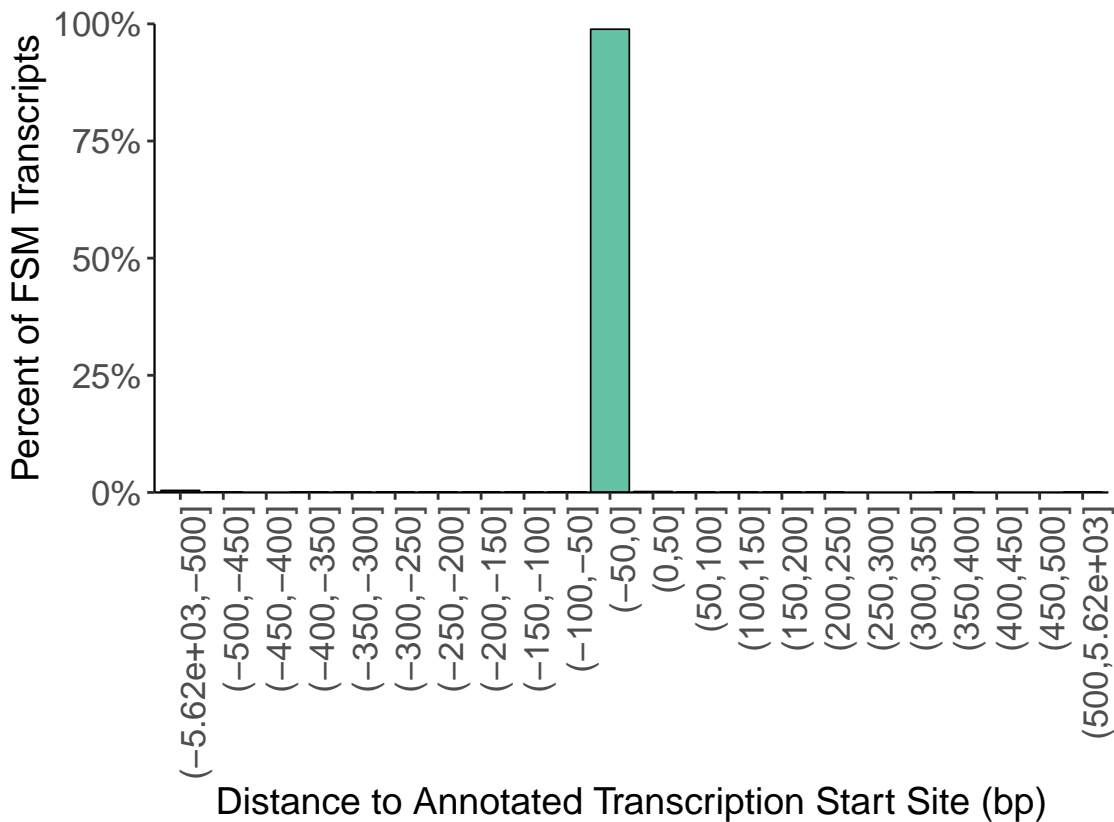

# Distance to Annotated Polyadenylation Site, ISM only

Negative values indicate upstream of annotated polyA site

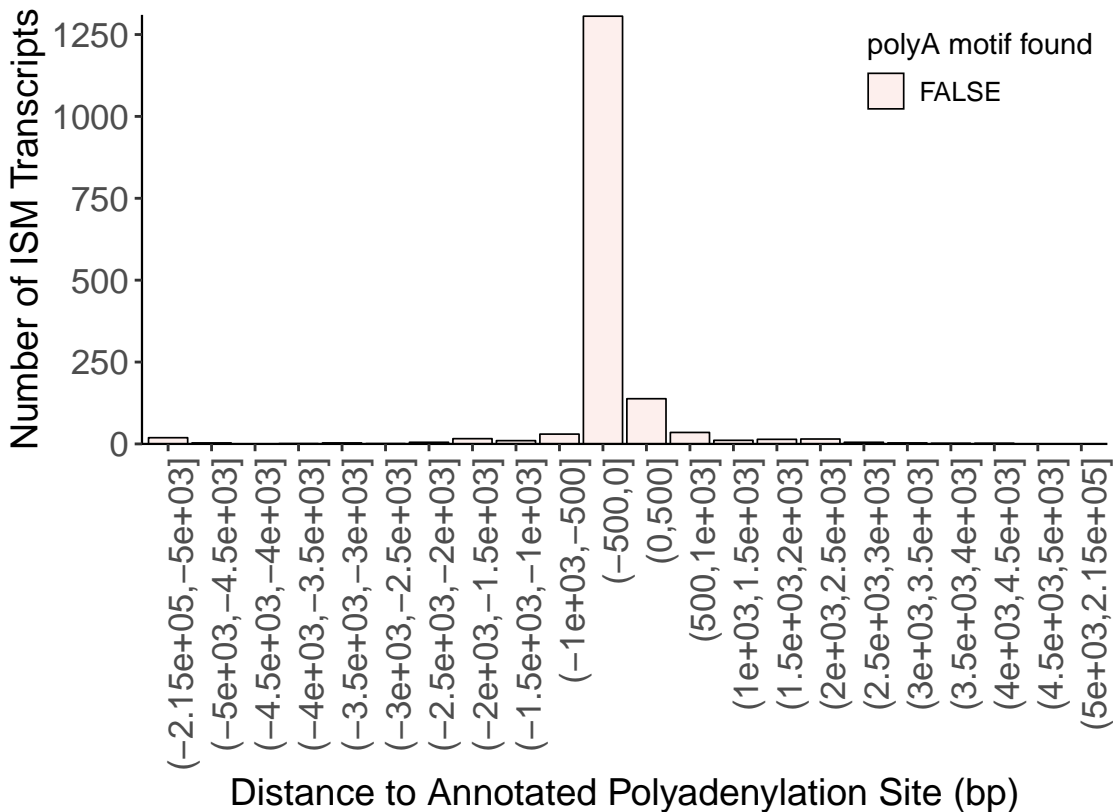

# Distance to Annotated Polyadenylation Site, ISM only

Negative values indicate upstream of annotated polyA site

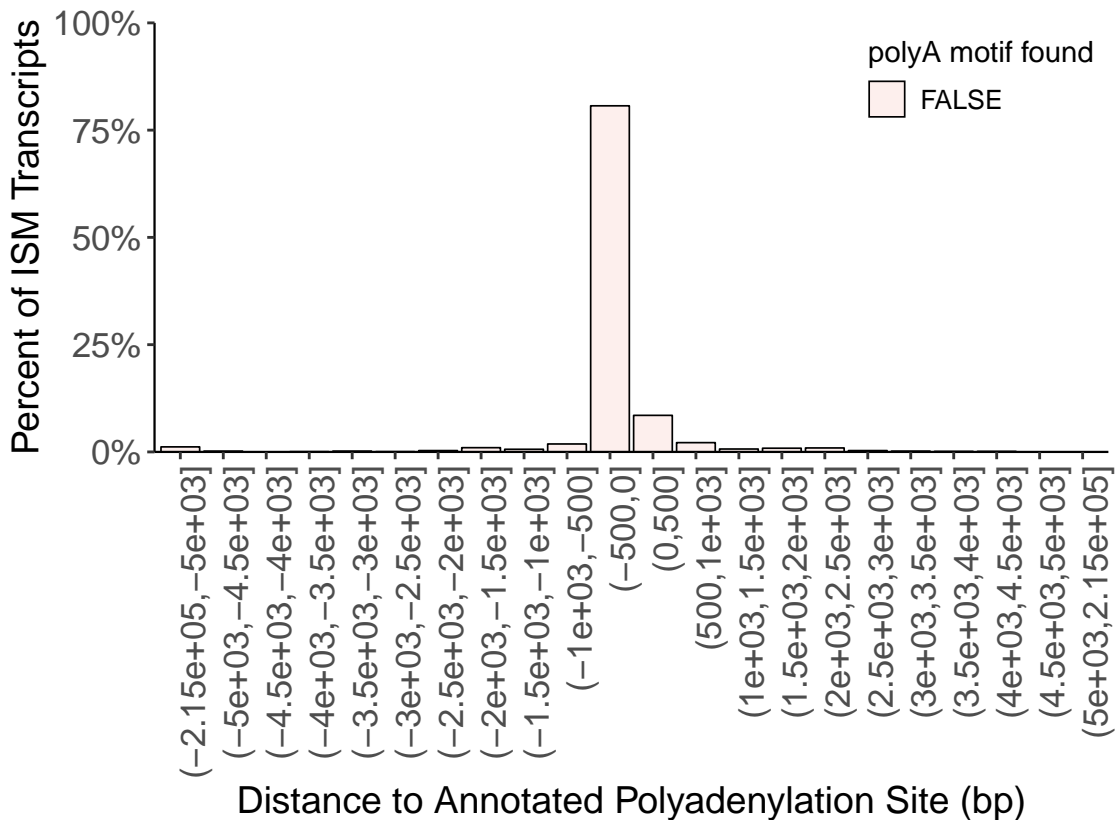

# Distance to Annotated Transcription Start Site, ISM only

Negative values indicate downstream of annotated TSS

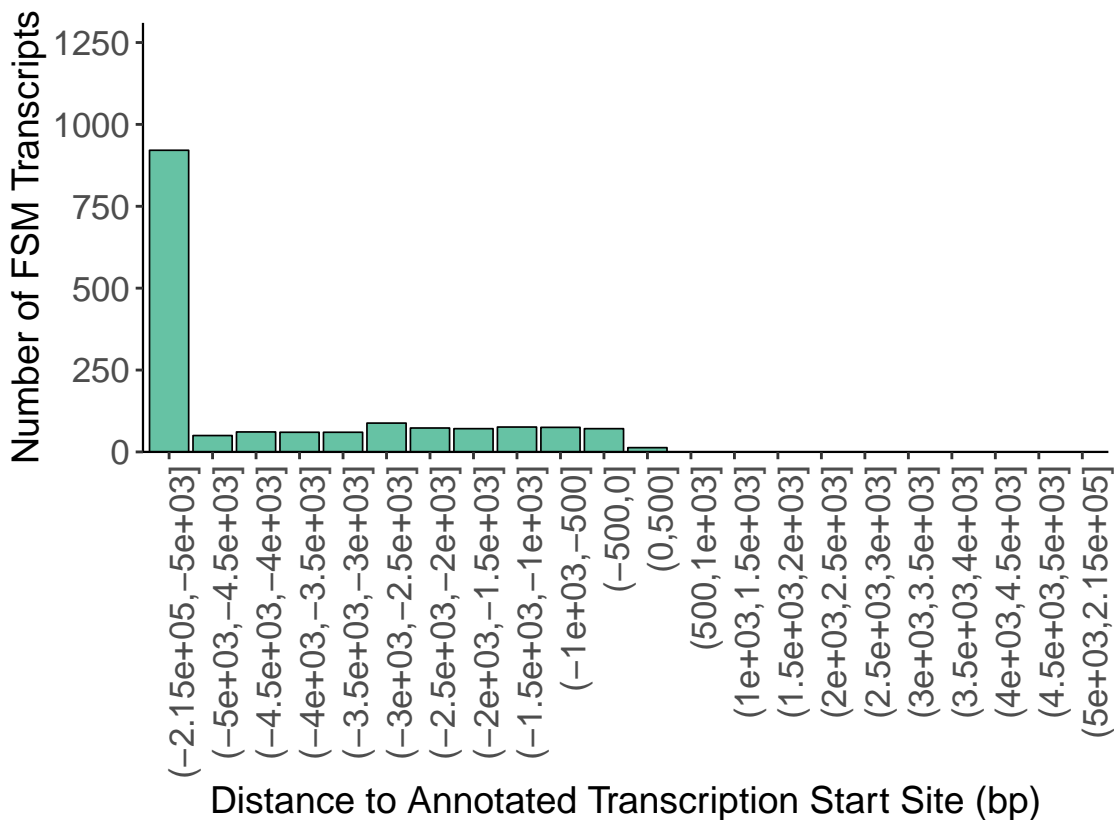

# Distance to Annotated Transcription Start Site, ISM only

Negative values indicate downstream of annotated TSS

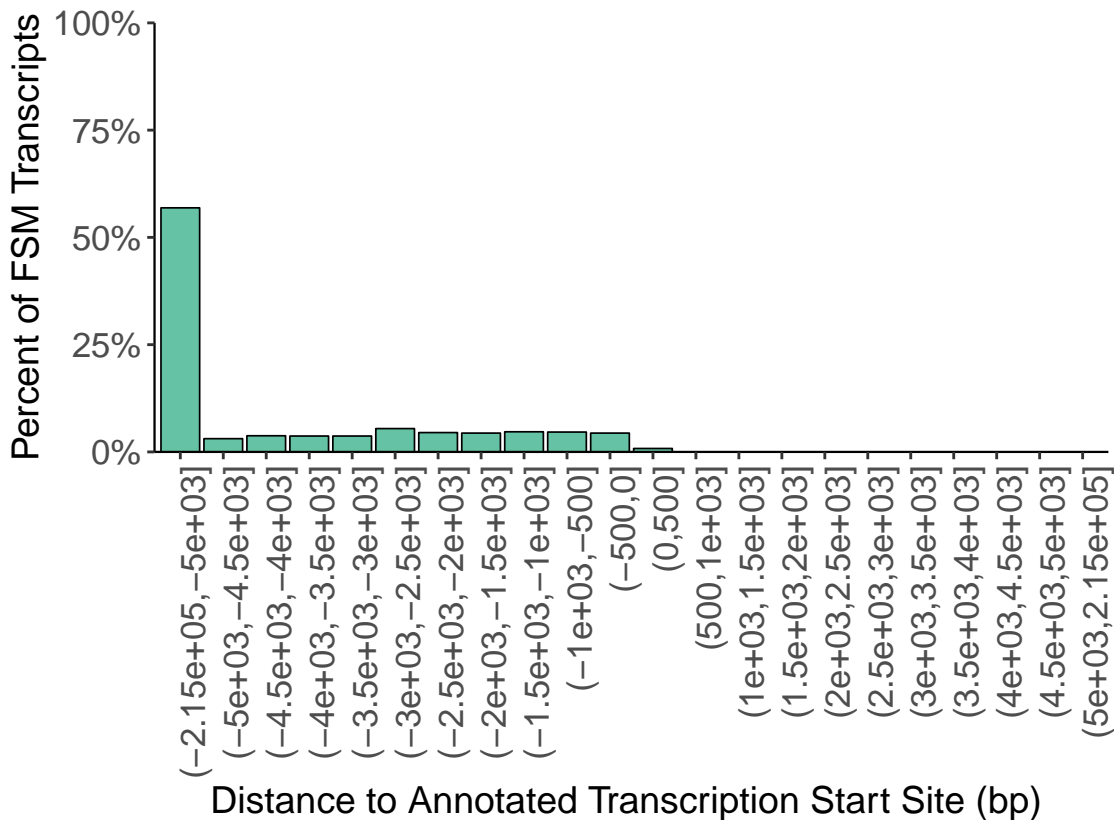

*Accumulation of FSM and ISM  
to the same reference transcript*



# Reference transcript redundance

Only FSM

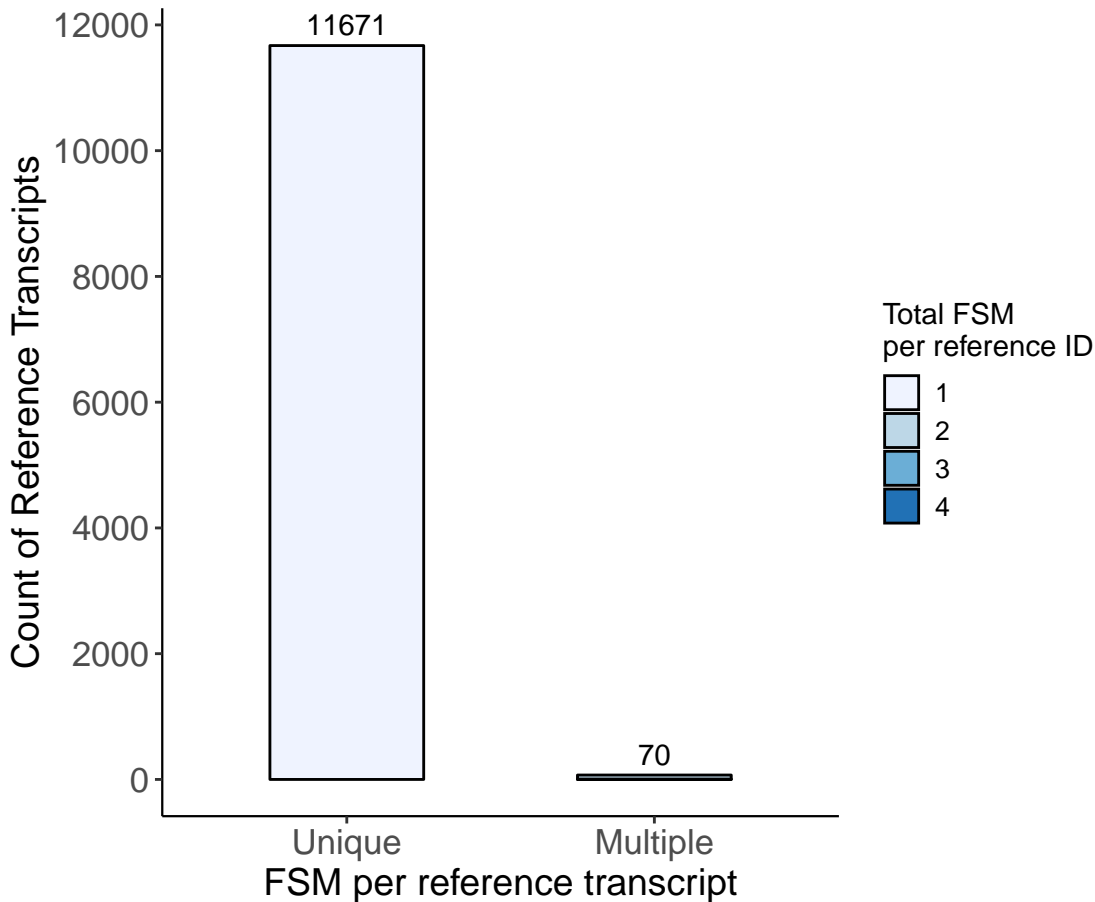

# Reference transcript redundance

Only ISM

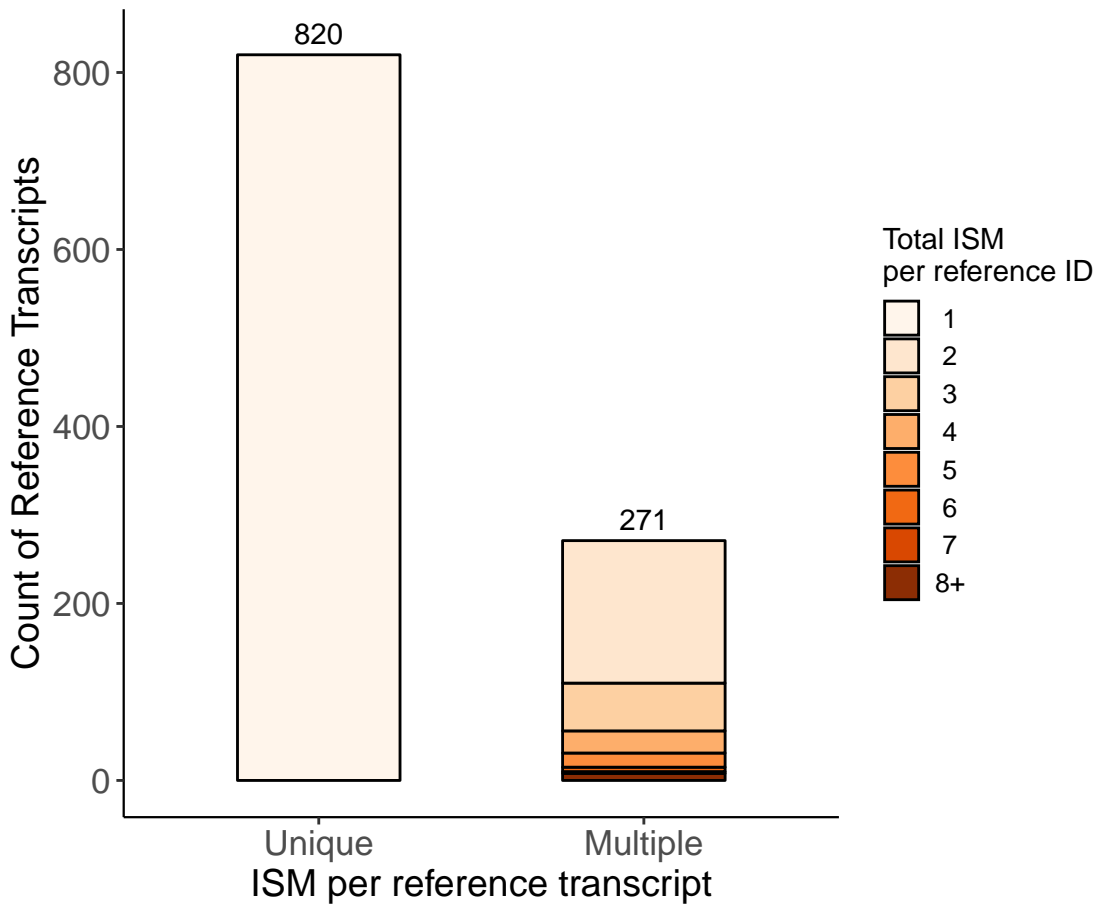

# Reference transcript redundance

FSM+ISM

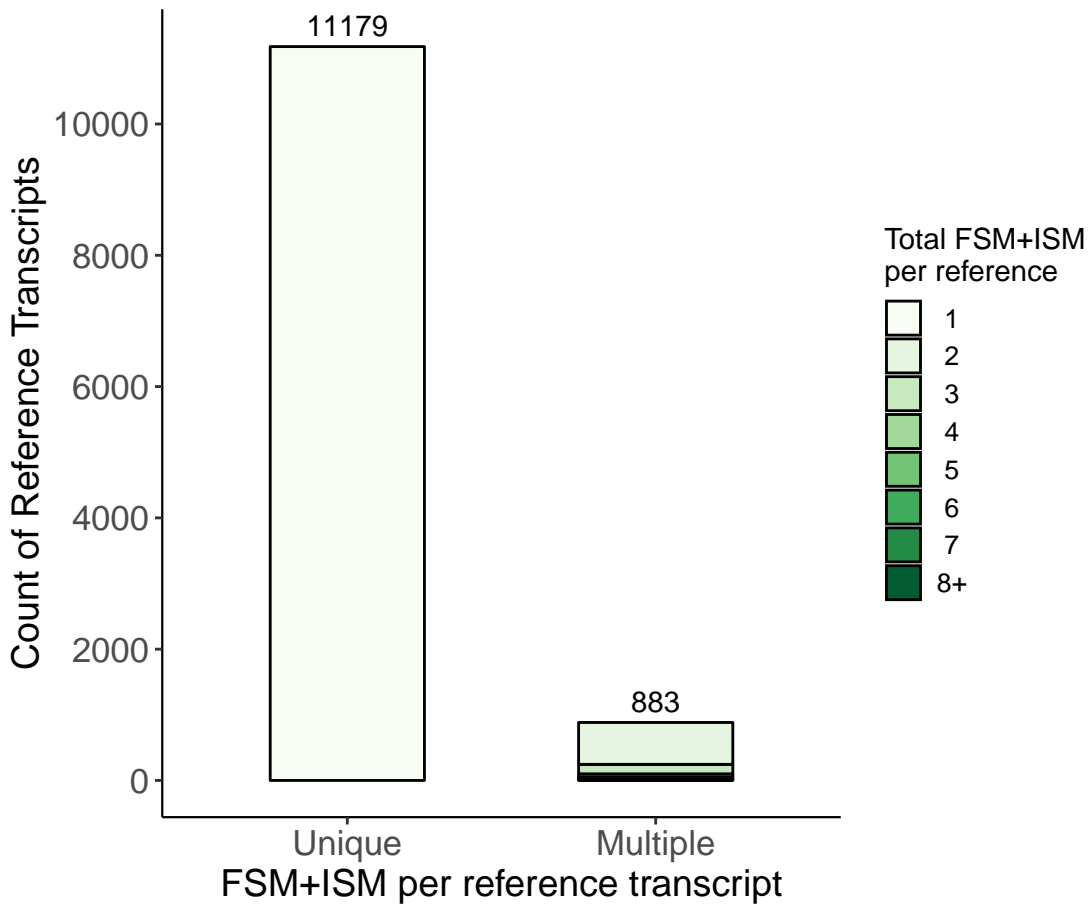

*Intra-Priming Quality Check*

## Possible Intra-Priming by Structural Category

Percent of genomic 'A's in downstream 20 bp

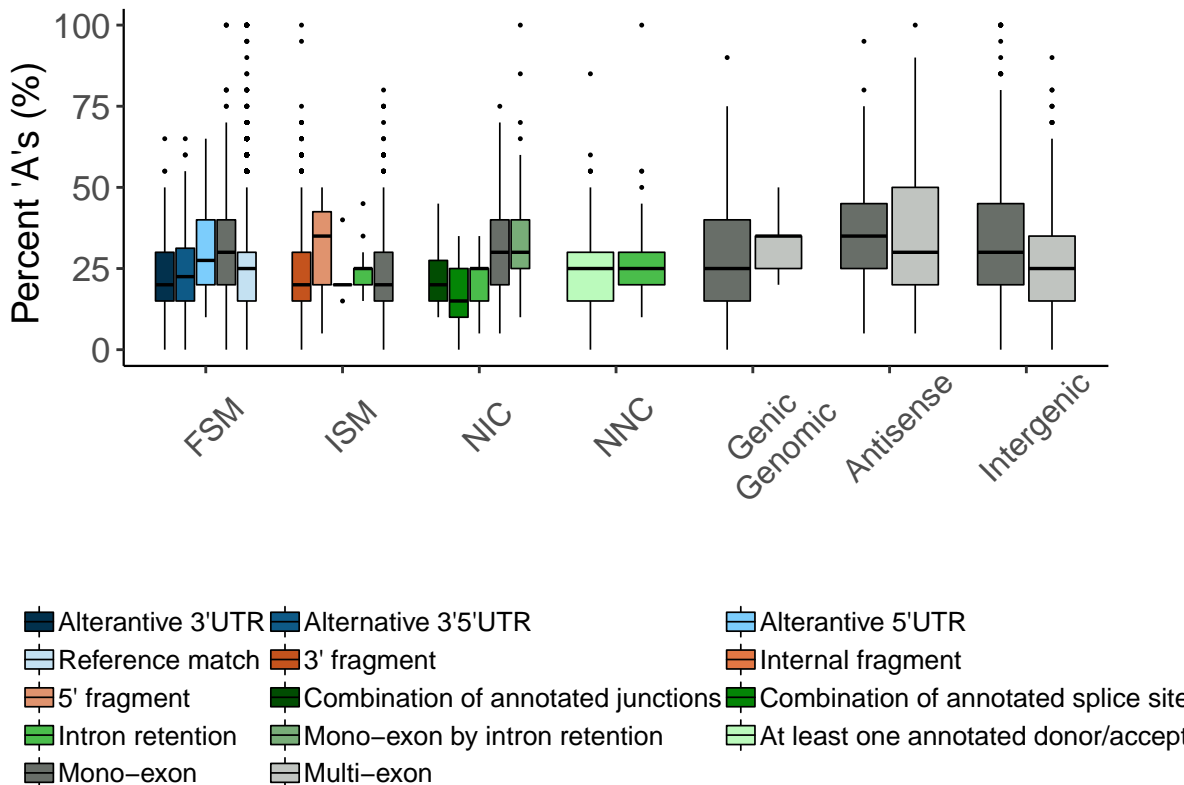

## Possible Intra-Priming, Mono- vs Multi-Exon

Percent of genomic 'A's in downstream 20 bp

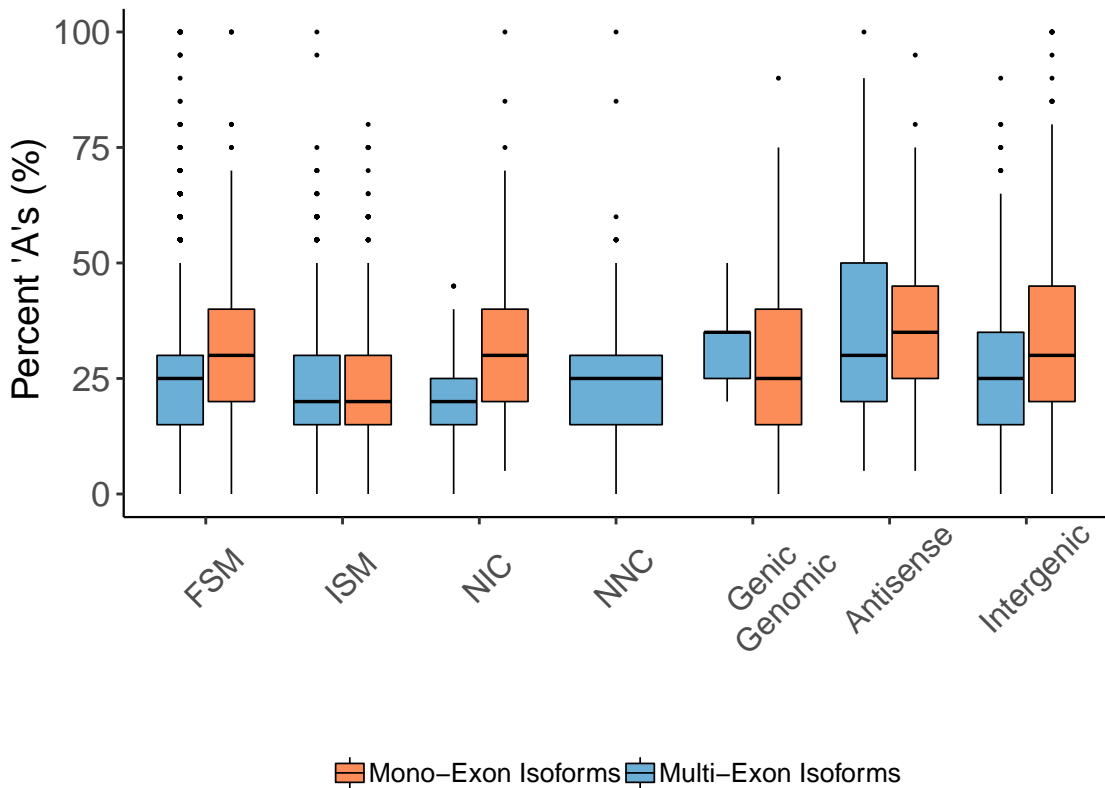

## Possible Intra-Priming, Coding vs Non-Coding

Percent of genomic 'A's in downstream 20 bp

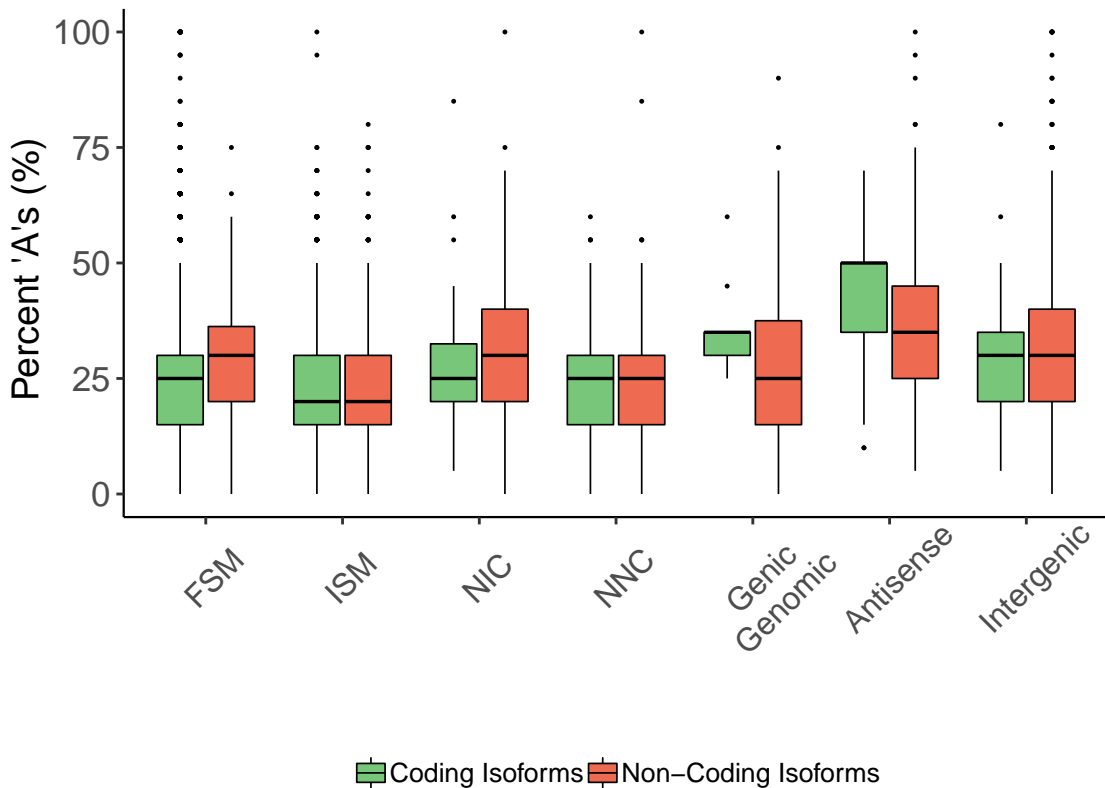

*Quality Controls*



## Incidence of RT-switching

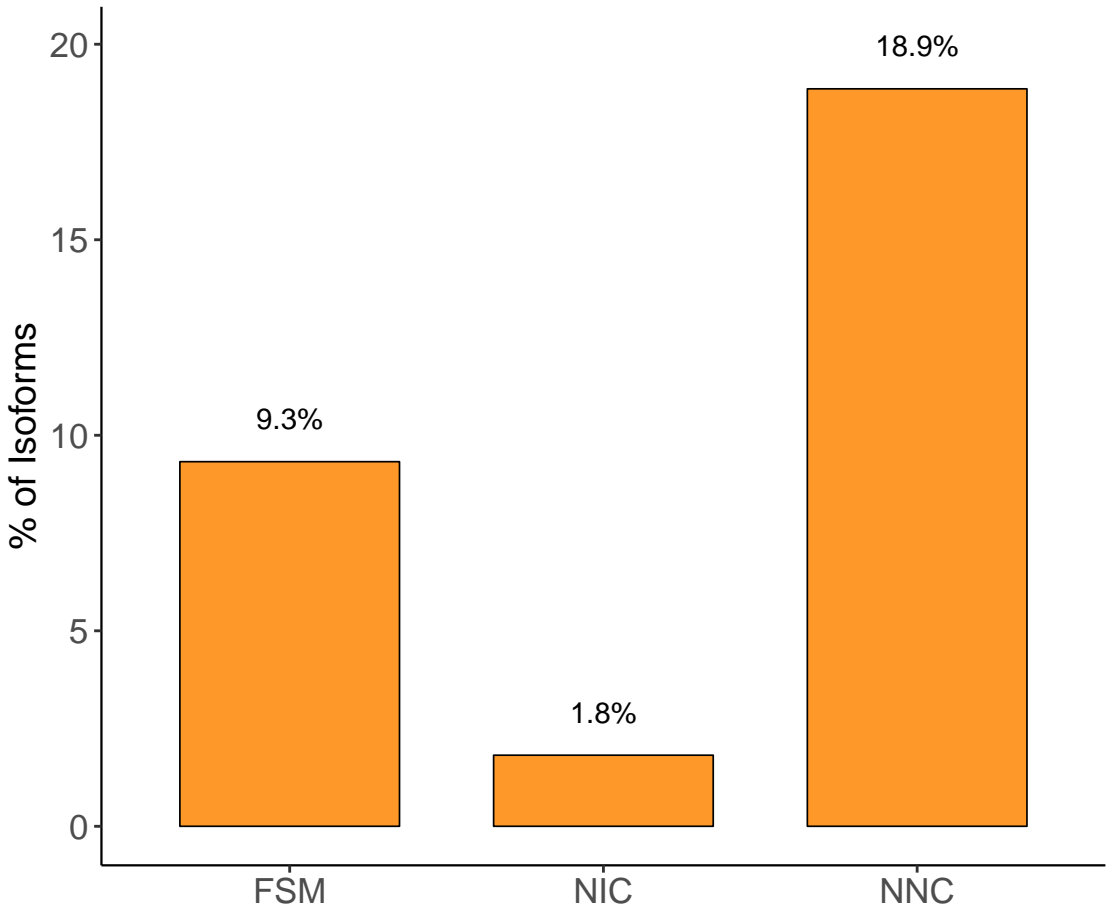

## Incidence of Non-Canonical Junctions

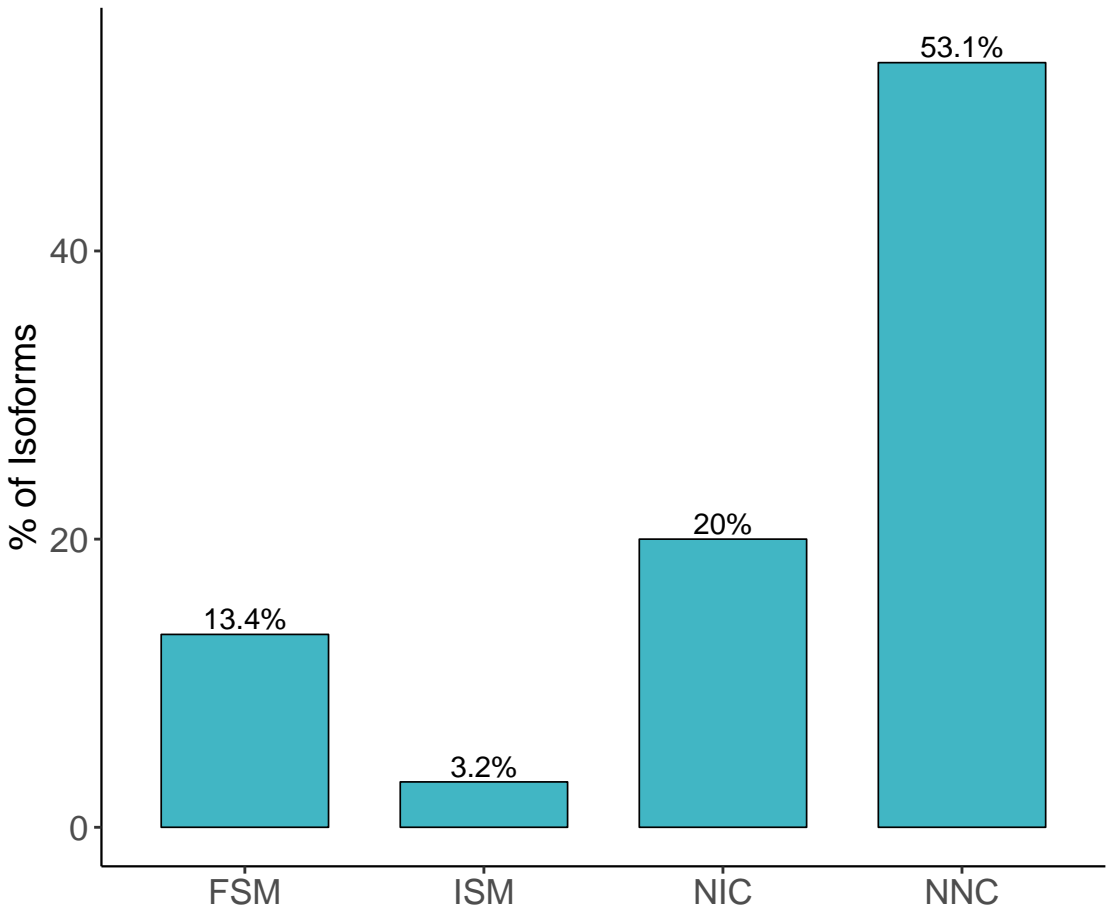

Incidence of NMD by structural category

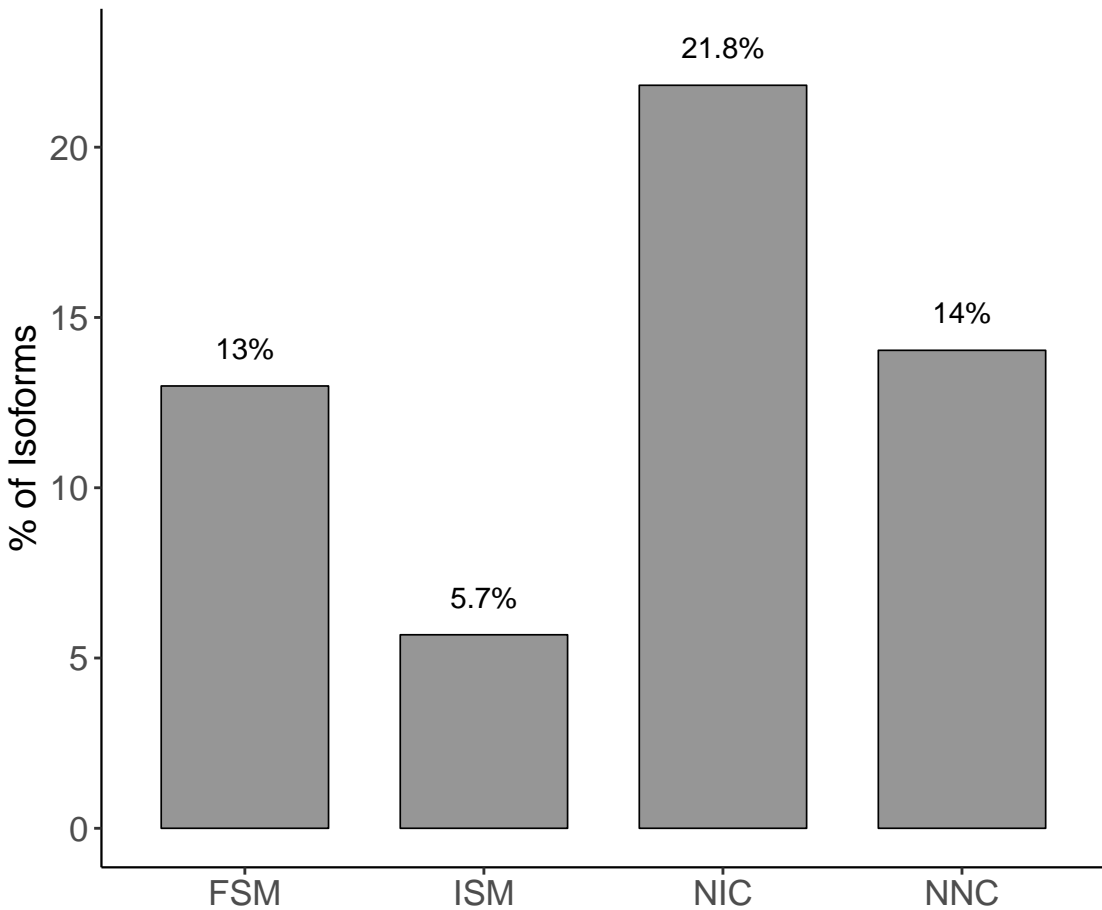

## Quality control attributes across structural categories

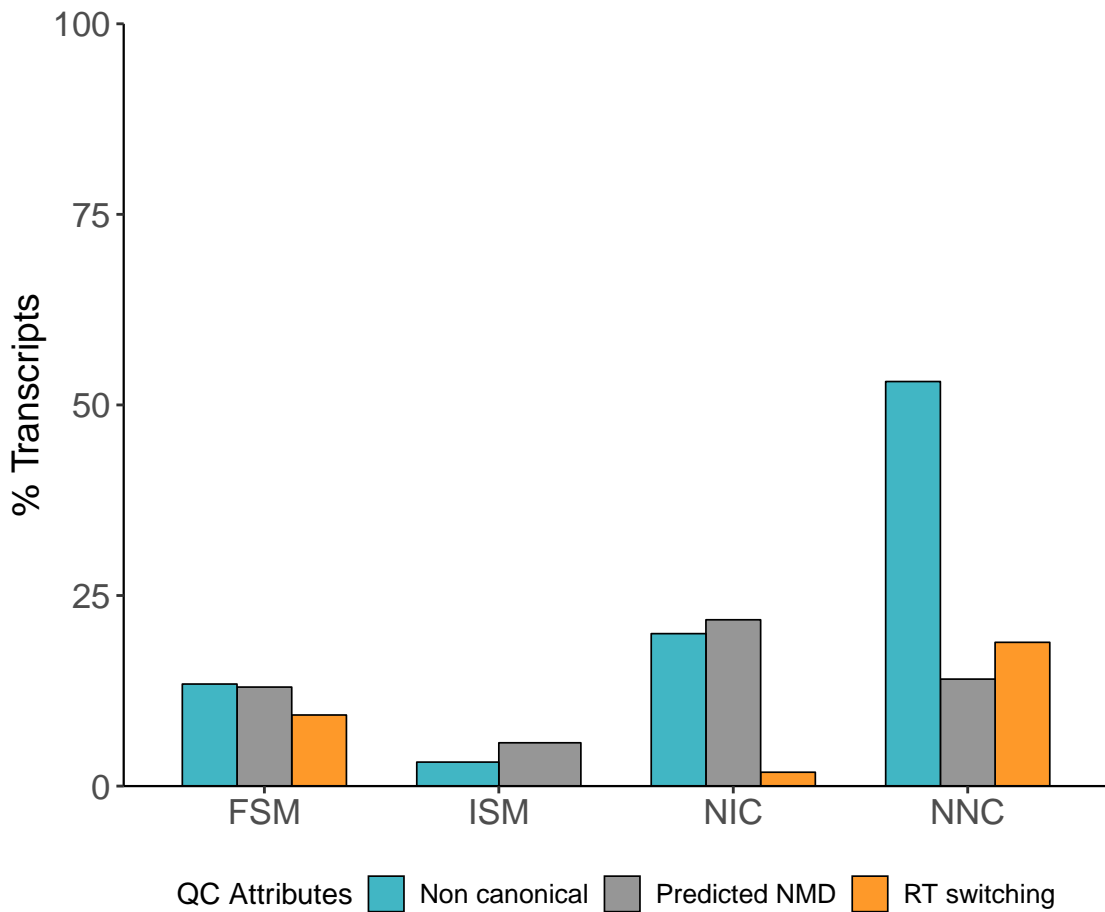

Supplement: Supplementary file 2 [file 1]
