# Supplementary material
Source: publisher figshare collection journal article supplement (https://gsajournals.figshare.com/articles/dataset/_/15043521)
Supplement: Supplementary file 1 [file 1]

## Sheet: Table S1
Supplementary Table S1. Samples used in this study
Purpose	BioSample Accession	Isolate	Sample name	Sex	Developmental stage	Tissue	Collection date	Geographic loaction	Source
DNA	SAMD00276454	Ginoza2017	Ginoza2017	Male	Adult	Muscle/sperm	2017	Okinawa, Japan	Farmed
RNA	SAMD00276521	Ginoza2017-M	antena-M	Male	Adult	Antenna	2017	Okinawa, Japan	Farmed
RNA	SAMD00276522	Ginoza2017-M	eyestalk-M	Male	Adult	Eyestalk	2017	Okinawa, Japan	Farmed
RNA	SAMD00276523	Ginoza2017-M	nerve-M	Male	Adult	Nerve	2017	Okinawa, Japan	Farmed
RNA	SAMD00276524	Ginoza2017-M	stomach-M	Male	Adult	Stomach	2017	Okinawa, Japan	Farmed
RNA	SAMD00276525	Ginoza2017-M	intestine-M	Male	Adult	Intestine	2017	Okinawa, Japan	Farmed
RNA	SAMD00276526	Ginoza2017-M	hepatopancreas-M	Male	Adult	Hepatopancreas	2017	Okinawa, Japan	Farmed
RNA	SAMD00276527	Ginoza2017-M	lymphoid_organ-M	Male	Adult	Lymphoid organ	2017	Okinawa, Japan	Farmed
RNA	SAMD00276528	Ginoza2017-M	hematocyte-M	Male	Adult	Hemocyte	2017	Okinawa, Japan	Farmed
RNA	SAMD00276529	Ginoza2017-M	hematogenesis_tissue-M	Male	Adult	Hematopoietic tissue	2017	Okinawa, Japan	Farmed
RNA	SAMD00276530	Ginoza2017-M	muscle-M	Male	Adult	Muscle	2017	Okinawa, Japan	Farmed
RNA	SAMD00276531	Ginoza2017-M	epidermis-M	Male	Adult	Epidermis	2017	Okinawa, Japan	Farmed
RNA	SAMD00276532	Ginoza2017-M	heart-M	Male	Adult	Heart	2017	Okinawa, Japan	Farmed
RNA	SAMD00276533	Ginoza2017-M	gill-M	Male	Adult	Gill	2017	Okinawa, Japan	Farmed
RNA	SAMD00276534	Ginoza2017-M	testis-M	Male	Adult	Testis	2017	Okinawa, Japan	Farmed
RNA	SAMD00276535	Ginoza2017-M	spermatophore	Male	Adult	Spermatophore	2017	Okinawa, Japan	Farmed
RNA	SAMD00276536	Ginoza2017-F	antena-F	Female	Adult	Antenna	2017	Okinawa, Japan	Farmed
RNA	SAMD00276537	Ginoza2017-F	eyestalk-F	Female	Adult	Eyestalk	2017	Okinawa, Japan	Farmed
RNA	SAMD00276538	Ginoza2017-F	nerve-F	Female	Adult	Nerve	2017	Okinawa, Japan	Farmed
RNA	SAMD00276539	Ginoza2017-F	stomach-F	Female	Adult	Stomach	2017	Okinawa, Japan	Farmed
RNA	SAMD00276540	Ginoza2017-F	intestine-F	Female	Adult	Intestine	2017	Okinawa, Japan	Farmed
RNA	SAMD00276541	Ginoza2017-F	hepatopancreas-F	Female	Adult	Hepatopancreas	2017	Okinawa, Japan	Farmed
RNA	SAMD00276542	Ginoza2017-F	lymphoid_organ-F	Female	Adult	Lymphoid organ	2017	Okinawa, Japan	Farmed
RNA	SAMD00276543	Ginoza2017-F	hematocyte-F	Female	Adult	Hemocyte	2017	Okinawa, Japan	Farmed
RNA	SAMD00276544	Ginoza2017-F	hematogenesis_tissue-F	Female	Adult	Hematopoietic tissue	2017	Okinawa, Japan	Farmed
RNA	SAMD00276545	Ginoza2017-F	muscle-F	Female	Adult	Muscle	2017	Okinawa, Japan	Farmed
RNA	SAMD00276546	Ginoza2017-F	epidermis-F	Female	Adult	Epidermis	2017	Okinawa, Japan	Farmed
RNA	SAMD00276547	Ginoza2017-F	heart-F	Female	Adult	Heart	2017	Okinawa, Japan	Farmed
RNA	SAMD00276548	Ginoza2017-F	gill-F	Female	Adult	Gill	2017	Okinawa, Japan	Farmed
RNA	SAMD00276549	Ginoza2017-F	ovary-F	Female	Adult	Ovary	2017	Okinawa, Japan	Farmed
RNA	SAMD00276550	Kumejima2017-L	larva1-1	Pooled male and female	Nauplius	Whole body	2017-05-15	Okinawa, Japan	Farmed
RNA	SAMD00276551	Kumejima2017-L	larva2-1	Pooled male and female	Nauplius	Whole body	2017-05-15	Okinawa, Japan	Farmed
RNA	SAMD00276552	Kumejima2017-L	larva3-1	Pooled male and female	Nauplius	Whole body	2017-05-16	Okinawa, Japan	Farmed
RNA	SAMD00276553	Kumejima2017-L	larva4-1	Pooled male and female	Nauplius	Whole body	2017-05-17	Okinawa, Japan	Farmed
RNA	SAMD00276554	Kumejima2017-L	larva0-2	Pooled male and female	Zoea	Whole body	2017-05-29	Okinawa, Japan	Farmed
RNA	SAMD00276555	Kumejima2017-L	larva1-2	Pooled male and female	Zoea	Whole body	2017-05-29	Okinawa, Japan	Farmed
RNA	SAMD00276556	Kumejima2017-L	larva3-2	Pooled male and female	Zoea	Whole body	2017-05-30	Okinawa, Japan	Farmed
RNA	SAMD00276557	Kumejima2017-L	larvaZ1-2	Pooled male and female	Zoea	Whole body	2017-05-30	Okinawa, Japan	Farmed
RNA	SAMD00276558	Kumejima2017-L	larva4-2	Pooled male and female	Zoea	Whole body	2017-05-31	Okinawa, Japan	Farmed
RNA	SAMD00276559	Kumejima2017-L	larvaM-2	Pooled male and female	Mysis	Whole body	2017-06-05	Okinawa, Japan	Farmed
RNA	SAMD00276560	Kumejima2017-L	larvaPL1-2	Pooled male and female	Mysis	Whole body	2017-06-07	Okinawa, Japan	Farmed
RNA	SAMD00276561	Kumejima2017-L	larvaPL2-2	Pooled male and female	Mysis	Whole body	2017-06-09	Okinawa, Japan	Farmed
RNA	SAMD00276562	Mj_wild_M	testis-N	Male	Adult	Testis	2017	Japan	Wild caught
RNA	SAMD00276563	Mj_wild_M	vas_deferens-N	Male	Adult	Vas deferens	2017	Japan	Wild caught
RNA	SAMD00276564	Mj_wild_M	androgenic_gland-N	Male	Adult	Androgenic gland	2017	Japan	Wild caught
RNA	SAMD00276565	Mj_wild_F	ovary-N	Female	Adult	Ovary	2017	Japan	Wild caught
RNA	SAMD00276566	Mj_farmed_M	testis-M2	Male	Adult	Testis	2017	Japan	Farmed
RNA	SAMD00276567	Mj_farmed_M	vas_deferens-M2	Male	Adult	Vas deferens	2017	Japan	Farmed
RNA	SAMD00276568	Mj_farmed_M	androgenic_gland-M2	Male	Adult	Androgenic gland	2017	Japan	Farmed
RNA	SAMD00276569	Mj_farmed_F	ovary-F2	Female	Adult	Ovary	2017	Japan	Farmed

## Sheet: Table S2
Table S2. M. japonicus sequencing data generated in this study.				Supplementary Table S2. Summary of sequencing reads generated in this study
Purpose	Library ID	BioSample	Experiment Accession Number	Run Accession Number	Platform	Construction Protocol	Library Layout	Number of reads	Total (bp)
DNA	Mj01muscleDNA_PE	SAMD00276454	DRX260858	DRR271272	Illumina HiSeq 4000	KAPA Hyper Prep Kit Illumina platforms (KK8504)	Paired-end	214801673	64133273458
DNA	Mj01muscleDNA_PE	SAMD00276454	DRX260858	DRR271273	Illumina HiSeq 4000	KAPA Hyper Prep Kit Illumina platforms (KK8504)	Paired-end	216439114	64615265869
DNA	Mj01spermDNA_PE	SAMD00276454	DRX260859	DRR271274	Illumina HiSeq 4000	KAPA Hyper Prep Kit Illumina platforms (KK8504)	Paired-end	250742228	74902982230
DNA	Mj01spermDNA_PE	SAMD00276454	DRX260859	DRR271275	Illumina HiSeq 4000	KAPA Hyper Prep Kit Illumina platforms (KK8504)	Paired-end	252762460	75463686614
DNA	Mj01muscleDNA_PE	SAMD00276454	DRX268326	DRR278743	Illumina HiSeq 4000	KAPA Hyper Prep Kit Illumina platforms (KK8504)	Paired-end	443953692	132593928421
DNA	Mj01spermDNA_PE	SAMD00276454	DRX268327	DRR278744	Illumina HiSeq 4000	KAPA Hyper Prep Kit Illumina platforms (KK8504)	Paired-end	509828370	152348732446
DNA	Mj01muscleDNA_ONT	SAMD00276454	DRX260860	DRR271276	Oxford Nanopore GridION	Ligation Sequencing Kit (SQK-LSK109)	Single-end	2479044	14559684922
DNA	Mj01muscleDNA_MP02k	SAMD00276454	DRX260861	DRR271277	Illumina HiSeq 4000	SageELF; Nextera Mate Pair Library Prep Kit (FC-132-1001)	Mate-pair	46693272	14026406593
DNA	Mj01muscleDNA_MP03k	SAMD00276454	DRX260862	DRR271278	Illumina HiSeq 4000	SageELF; Nextera Mate Pair Library Prep Kit (FC-132-1001)	Mate-pair	42795878	12853324323
DNA	Mj01muscleDNA_MP04k	SAMD00276454	DRX260863	DRR271279	Illumina HiSeq 4000	SageELF; Nextera Mate Pair Library Prep Kit (FC-132-1001)	Mate-pair	47366303	14227659948
DNA	Mj01muscleDNA_MP05k	SAMD00276454	DRX260864	DRR271280	Illumina HiSeq 4000	SageELF; Nextera Mate Pair Library Prep Kit (FC-132-1001)	Mate-pair	34838683	10426547189
DNA	Mj01muscleDNA_MP06k	SAMD00276454	DRX260865	DRR271281	Illumina HiSeq 4000	SageELF; Nextera Mate Pair Library Prep Kit (FC-132-1001)	Mate-pair	47876053	14377254395
DNA	Mj01muscleDNA_MP07k	SAMD00276454	DRX260866	DRR271282	Illumina HiSeq 4000	SageELF; Nextera Mate Pair Library Prep Kit (FC-132-1001)	Mate-pair	43957895	13090426465
DNA	Mj01muscleDNA_MP08k	SAMD00276454	DRX260867	DRR271283	Illumina HiSeq 4000	SageELF; Nextera Mate Pair Library Prep Kit (FC-132-1001)	Mate-pair	40181364	12054489411
DNA	Mj01muscleDNA_MP10k	SAMD00276454	DRX260868	DRR271284	Illumina HiSeq 4000	SageELF; Nextera Mate Pair Library Prep Kit (FC-132-1001)	Mate-pair	42817861	12747813984
DNA	Mj01muscleDNA_MP12k	SAMD00276454	DRX260869	DRR271285	Illumina HiSeq 4000	SageELF; Nextera Mate Pair Library Prep Kit (FC-132-1001)	Mate-pair	48195545	14162016601
DNA	Mj01muscleDNA_MP14k	SAMD00276454	DRX260870	DRR271286	Illumina HiSeq 4000	SageELF; Nextera Mate Pair Library Prep Kit (FC-132-1001)	Mate-pair	44430142	12838302444
DNA	Mj01muscleDNA_MP15k	SAMD00276454	DRX260871	DRR271287	Illumina HiSeq 4000	SageELF; Nextera Mate Pair Library Prep Kit (FC-132-1001)	Mate-pair	45586360	13266923920
RNA	antena-M	SAMD00276521	DRX263860	DRR274276	Illumina HiSeq 4000	KAPA mRNA HyperPrep Kit Illumina Platforms (KK8581)	Paired-end	26391858	7907918184
RNA	eyestalk-M	SAMD00276522	DRX263861	DRR274277	Illumina HiSeq 4000	KAPA mRNA HyperPrep Kit Illumina Platforms (KK8581)	Paired-end	28930547	8670086406
RNA	nerve-M	SAMD00276523	DRX263862	DRR274278	Illumina HiSeq 4000	KAPA mRNA HyperPrep Kit Illumina Platforms (KK8581)	Paired-end	24494913	7345014002
RNA	stomach-M	SAMD00276524	DRX263863	DRR274279	Illumina HiSeq 4000	KAPA mRNA HyperPrep Kit Illumina Platforms (KK8581)	Paired-end	22637019	6779685320
RNA	intestine-M	SAMD00276525	DRX263864	DRR274280	Illumina HiSeq 4000	KAPA mRNA HyperPrep Kit Illumina Platforms (KK8581)	Paired-end	23656522	7091509048
RNA	hepatopancreas-M	SAMD00276526	DRX263865	DRR274281	Illumina HiSeq 4000	KAPA mRNA HyperPrep Kit Illumina Platforms (KK8581)	Paired-end	22553915	6759047898
RNA	lymphoid_organ-M	SAMD00276527	DRX263866	DRR274282	Illumina HiSeq 4000	KAPA mRNA HyperPrep Kit Illumina Platforms (KK8581)	Paired-end	24627814	7366192523
RNA	hematocyte-M	SAMD00276528	DRX263867	DRR274283	Illumina HiSeq 4000	KAPA mRNA HyperPrep Kit Illumina Platforms (KK8581)	Paired-end	23092783	6920559784
RNA	hematogenesis_tissue-M	SAMD00276529	DRX263868	DRR274284	Illumina HiSeq 4000	KAPA mRNA HyperPrep Kit Illumina Platforms (KK8581)	Paired-end	19232500	5746297646
RNA	muscle-M	SAMD00276530	DRX263869	DRR274285	Illumina HiSeq 4000	KAPA mRNA HyperPrep Kit Illumina Platforms (KK8581)	Paired-end	25664568	7696798724
RNA	epidermis-M	SAMD00276531	DRX263870	DRR274286	Illumina HiSeq 4000	KAPA mRNA HyperPrep Kit Illumina Platforms (KK8581)	Paired-end	24037208	7191595937
RNA	heart-M	SAMD00276532	DRX263871	DRR274287	Illumina HiSeq 4000	KAPA mRNA HyperPrep Kit Illumina Platforms (KK8581)	Paired-end	23390725	7006407800
RNA	gill-M	SAMD00276533	DRX263872	DRR274288	Illumina HiSeq 4000	KAPA mRNA HyperPrep Kit Illumina Platforms (KK8581)	Paired-end	26027111	7798929262
RNA	testis-M	SAMD00276534	DRX263873	DRR274289	Illumina HiSeq 4000	KAPA mRNA HyperPrep Kit Illumina Platforms (KK8581)	Paired-end	24697715	7388119708
RNA	spermatophore	SAMD00276535	DRX263874	DRR274290	Illumina HiSeq 4000	KAPA mRNA HyperPrep Kit Illumina Platforms (KK8581)	Paired-end	26034461	7776219311
RNA	antena-F	SAMD00276536	DRX263875	DRR274291	Illumina HiSeq 4000	KAPA mRNA HyperPrep Kit Illumina Platforms (KK8581)	Paired-end	26534219	7952829824
RNA	eyestalk-F	SAMD00276537	DRX263876	DRR274292	Illumina HiSeq 4000	KAPA mRNA HyperPrep Kit Illumina Platforms (KK8581)	Paired-end	24858900	7446940933
RNA	nerve-F	SAMD00276538	DRX263877	DRR274293	Illumina HiSeq 4000	KAPA mRNA HyperPrep Kit Illumina Platforms (KK8581)	Paired-end	27228719	8159996099
RNA	stomach-F	SAMD00276539	DRX263878	DRR274294	Illumina HiSeq 4000	KAPA mRNA HyperPrep Kit Illumina Platforms (KK8581)	Paired-end	24502623	7343821790
RNA	intestine-F	SAMD00276540	DRX263879	DRR274295	Illumina HiSeq 4000	KAPA mRNA HyperPrep Kit Illumina Platforms (KK8581)	Paired-end	23377101	7004569494
RNA	hepatopancreas-F	SAMD00276541	DRX263880	DRR274296	Illumina HiSeq 4000	KAPA mRNA HyperPrep Kit Illumina Platforms (KK8581)	Paired-end	21890292	6551073910
RNA	lymphoid_organ-F	SAMD00276542	DRX263881	DRR274297	Illumina HiSeq 4000	KAPA mRNA HyperPrep Kit Illumina Platforms (KK8581)	Paired-end	25764518	7702132780
RNA	hematocyte-F	SAMD00276543	DRX263882	DRR274298	Illumina HiSeq 4000	KAPA mRNA HyperPrep Kit Illumina Platforms (KK8581)	Paired-end	25655308	7681644830
RNA	hematogenesis_tissue-F	SAMD00276544	DRX263883	DRR274299	Illumina HiSeq 4000	KAPA mRNA HyperPrep Kit Illumina Platforms (KK8581)	Paired-end	23094178	6907167463
RNA	muscle-F	SAMD00276545	DRX263884	DRR274300	Illumina HiSeq 4000	KAPA mRNA HyperPrep Kit Illumina Platforms (KK8581)	Paired-end	24460325	7342355111
RNA	epidermis-F	SAMD00276546	DRX263885	DRR274301	Illumina HiSeq 4000	KAPA mRNA HyperPrep Kit Illumina Platforms (KK8581)	Paired-end	30497355	9140499861
RNA	heart-F	SAMD00276547	DRX263886	DRR274302	Illumina HiSeq 4000	KAPA mRNA HyperPrep Kit Illumina Platforms (KK8581)	Paired-end	28833643	8645129025
RNA	gill-F	SAMD00276548	DRX263887	DRR274303	Illumina HiSeq 4000	KAPA mRNA HyperPrep Kit Illumina Platforms (KK8581)	Paired-end	26705666	8008372353
RNA	ovary-F	SAMD00276549	DRX263888	DRR274304	Illumina HiSeq 4000	KAPA mRNA HyperPrep Kit Illumina Platforms (KK8581)	Paired-end	25373210	7618150226
RNA	larva1-1	SAMD00276550	DRX263889	DRR274305	Illumina HiSeq 4000	KAPA mRNA HyperPrep Kit Illumina Platforms (KK8581)	Paired-end	22938453	6886048007
RNA	larva2-1	SAMD00276551	DRX263890	DRR274306	Illumina HiSeq 4000	KAPA mRNA HyperPrep Kit Illumina Platforms (KK8581)	Paired-end	26130650	7842071856
RNA	larva3-1	SAMD00276552	DRX263891	DRR274307	Illumina HiSeq 4000	KAPA mRNA HyperPrep Kit Illumina Platforms (KK8581)	Paired-end	25447359	7638723593
RNA	larva4-1	SAMD00276553	DRX263892	DRR274308	Illumina HiSeq 4000	KAPA mRNA HyperPrep Kit Illumina Platforms (KK8581)	Paired-end	23375808	7013433763
RNA	larva0-2	SAMD00276554	DRX263893	DRR274309	Illumina HiSeq 4000	KAPA mRNA HyperPrep Kit Illumina Platforms (KK8581)	Paired-end	26259426	7883442116
RNA	larva1-2	SAMD00276555	DRX263894	DRR274310	Illumina HiSeq 4000	KAPA mRNA HyperPrep Kit Illumina Platforms (KK8581)	Paired-end	24798964	7447749675
RNA	larva3-2	SAMD00276556	DRX263895	DRR274311	Illumina HiSeq 4000	KAPA mRNA HyperPrep Kit Illumina Platforms (KK8581)	Paired-end	21501893	6452473166
RNA	larvaZ1-2	SAMD00276557	DRX263896	DRR274312	Illumina HiSeq 4000	KAPA mRNA HyperPrep Kit Illumina Platforms (KK8581)	Paired-end	19315381	5788873534
RNA	larva4-2	SAMD00276558	DRX263897	DRR274313	Illumina HiSeq 4000	KAPA mRNA HyperPrep Kit Illumina Platforms (KK8581)	Paired-end	21859018	6541513022
RNA	larvaM-2	SAMD00276559	DRX263898	DRR274314	Illumina HiSeq 4000	KAPA mRNA HyperPrep Kit Illumina Platforms (KK8581)	Paired-end	22891429	6855041070
RNA	larvaPL1-2	SAMD00276560	DRX263899	DRR274315	Illumina HiSeq 4000	KAPA mRNA HyperPrep Kit Illumina Platforms (KK8581)	Paired-end	18639829	5582957032
RNA	larvaPL2-2	SAMD00276561	DRX263900	DRR274316	Illumina HiSeq 4000	KAPA mRNA HyperPrep Kit Illumina Platforms (KK8581)	Paired-end	18226559	5461398069
RNA	testis-N	SAMD00276562	DRX263901	DRR274317	Illumina HiSeq 4000	KAPA mRNA HyperPrep Kit Illumina Platforms (KK8581)	Paired-end	21195608	6346689813
RNA	vas_deferens-N	SAMD00276563	DRX263902	DRR274318	Illumina HiSeq 4000	KAPA mRNA HyperPrep Kit Illumina Platforms (KK8581)	Paired-end	23145783	6929610674
RNA	androgenic_gland-N	SAMD00276564	DRX263903	DRR274319	Illumina HiSeq 4000	KAPA mRNA HyperPrep Kit Illumina Platforms (KK8581)	Paired-end	21771339	6514032983
RNA	ovary-N	SAMD00276565	DRX263904	DRR274320	Illumina HiSeq 4000	KAPA mRNA HyperPrep Kit Illumina Platforms (KK8581)	Paired-end	17125522	5138495416
RNA	testis-M2	SAMD00276566	DRX263905	DRR274321	Illumina HiSeq 4000	KAPA mRNA HyperPrep Kit Illumina Platforms (KK8581)	Paired-end	18221342	5460351144
RNA	vas_deferens-M2	SAMD00276567	DRX263906	DRR274322	Illumina HiSeq 4000	KAPA mRNA HyperPrep Kit Illumina Platforms (KK8581)	Paired-end	18957354	5677605477
RNA	androgenic_gland-M2	SAMD00276568	DRX263907	DRR274323	Illumina HiSeq 4000	KAPA mRNA HyperPrep Kit Illumina Platforms (KK8581)	Paired-end	20329648	6087008658
RNA	ovary-F2	SAMD00276569	DRX263908	DRR274324	Illumina HiSeq 4000	KAPA mRNA HyperPrep Kit Illumina Platforms (KK8581)	Paired-end	17808217	5326453947
RNA	hepatopancreas-M_ELF_5k	SAMD00276526	DRX263909	DRR274325	PacBio RS II	SMARTer Pico PCR cDNA Synthesis Kit (6349281); SageELF (0.75% 1-18kb) (ELD7510)	Single-end	276831	2208066310
RNA	hepatopancreas-M_ELF_3-5k	SAMD00276526	DRX263910	DRR274326	PacBio RS II	SMARTer Pico PCR cDNA Synthesis Kit (6349281); SageELF (0.75% 1-18kb) (ELD7510)	Single-end	489653	2738194115
RNA	hepatopancreas-M_ELF_2-3k	SAMD00276526	DRX263911	DRR274327	PacBio RS II	SMARTer Pico PCR cDNA Synthesis Kit (6349281); SageELF (0.75% 1-18kb) (ELD7510)	Single-end	1052747	2473925995
RNA	hepatopancreas-M_ELF_0.8-2k	SAMD00276526	DRX263912	DRR274328	PacBio RS II	SMARTer Pico PCR cDNA Synthesis Kit (6349281); SageELF (0.75% 1-18kb) (ELD7510)	Single-end	1798103	2461594461
RNA	hematocyte-M_ELF_5k	SAMD00276528	DRX263913	DRR274329	PacBio RS II	SMARTer Pico PCR cDNA Synthesis Kit (6349281); SageELF (0.75% 1-18kb) (ELD7510)	Single-end	253868	2174859426
RNA	hematocyte-M_ELF_3-5k	SAMD00276528	DRX263914	DRR274330	PacBio RS II	SMARTer Pico PCR cDNA Synthesis Kit (6349281); SageELF (0.75% 1-18kb) (ELD7510)	Single-end	663831	2780783499
RNA	hematocyte-M_ELF_2-3k	SAMD00276528	DRX263915	DRR274331	PacBio RS II	SMARTer Pico PCR cDNA Synthesis Kit (6349281); SageELF (0.75% 1-18kb) (ELD7510)	Single-end	903571	2653847211
RNA	hematocyte-M_ELF_0.8-2k	SAMD00276528	DRX263916	DRR274332	PacBio RS II	SMARTer Pico PCR cDNA Synthesis Kit (6349281); SageELF (0.75% 1-18kb) (ELD7510)	Single-end	2056855	2808399428
RNA	larva4-2_ELF_5k	SAMD00276558	DRX263917	DRR274333	PacBio RS II	SMARTer Pico PCR cDNA Synthesis Kit (6349281); SageELF (0.75% 1-18kb) (ELD7510)	Single-end	320452	2692623635
RNA	larva4-2_ELF_3-5k	SAMD00276558	DRX263918	DRR274334	PacBio RS II	SMARTer Pico PCR cDNA Synthesis Kit (6349281); SageELF (0.75% 1-18kb) (ELD7510)	Single-end	497533	2758815968
RNA	larva4-2_ELF_2-3k	SAMD00276558	DRX263919	DRR274335	PacBio RS II	SMARTer Pico PCR cDNA Synthesis Kit (6349281); SageELF (0.75% 1-18kb) (ELD7510)	Single-end	892020	2577589800
RNA	larva4-2_ELF_0.8-2k	SAMD00276558	DRX263920	DRR274336	PacBio RS II	SMARTer Pico PCR cDNA Synthesis Kit (6349281); SageELF (0.75% 1-18kb) (ELD7510)	Single-end	1739806	2378987858
RNA	larvaPL1-2_ELF_5k	SAMD00276560	DRX263921	DRR274337	PacBio RS II	SMARTer Pico PCR cDNA Synthesis Kit (6349281); SageELF (0.75% 1-18kb) (ELD7510)	Single-end	305422	2562432935
RNA	larvaPL1-2_ELF_3-5k	SAMD00276560	DRX263922	DRR274338	PacBio RS II	SMARTer Pico PCR cDNA Synthesis Kit (6349281); SageELF (0.75% 1-18kb) (ELD7510)	Single-end	497220	2943675672
RNA	larvaPL1-2_ELF_2-3k	SAMD00276560	DRX263923	DRR274339	PacBio RS II	SMARTer Pico PCR cDNA Synthesis Kit (6349281); SageELF (0.75% 1-18kb) (ELD7510)	Single-end	807490	2284930189
RNA	larvaPL1-2_ELF_0.8-2k	SAMD00276560	DRX263924	DRR274340	PacBio RS II	SMARTer Pico PCR cDNA Synthesis Kit (6349281); SageELF (0.75% 1-18kb) (ELD7510)	Single-end	1865887	2595610832

## Sheet: Table S3
Supplementary Table S3: Summary of trimmed genomic reads
Purpose	Library ID	Proccessing	Number of reads	Minimum (bp)	Average (bp)	Maximum (bp)	Total (bp)
De novo assembly (SPAdes); gap filling (Sealer); polishing (NtEdit)	Mj01spermDNA_PE	Fastp v0.19.4	310950506	140	150.5	151	93583171661
Redundancy removal and scaffolding (Redundans)	Mj01spermDNA_PE	Fastp v0.19.6	871322616	31	148.5	151	258753627578
Redundancy removal and scaffolding (Redundans)	Mj01muscleDNA_MP02k	Trimmomatic v0.36; NextClip v1.3.1	3541231	36	61.6	151	427238036
Redundancy removal and scaffolding (Redundans)	Mj01muscleDNA_MP03k	Trimmomatic v0.36; NextClip v1.3.1	3086112	36	61.4	151	371013988
Redundancy removal and scaffolding (Redundans); REAPR	Mj01muscleDNA_MP04k	Trimmomatic v0.36; NextClip v1.3.1	3612373	36	61.6	151	435894294
Redundancy removal and scaffolding (Redundans); REAPR	Mj01muscleDNA_MP05k	Trimmomatic v0.36; NextClip v1.3.1	2538626	36	61.6	151	306365106
Redundancy removal and scaffolding (Redundans); REAPR	Mj01muscleDNA_MP06k	Trimmomatic v0.36; NextClip v1.3.1	3776009	36	61.5	151	455993401
Redundancy removal and scaffolding (Redundans); REAPR	Mj01muscleDNA_MP07k	Trimmomatic v0.36; NextClip v1.3.1	3146490	36	61.4	151	379117877
Redundancy removal and scaffolding (Redundans); REAPR	Mj01muscleDNA_MP08k	Trimmomatic v0.36; NextClip v1.3.1	2858240	36	61.4	151	344186651
Redundancy removal and scaffolding (Redundans); REAPR	Mj01muscleDNA_MP10k	Trimmomatic v0.36; NextClip v1.3.1	3052756	36	61.5	151	367791319
Redundancy removal and scaffolding (Redundans); REAPR	Mj01muscleDNA_MP12k	Trimmomatic v0.36; NextClip v1.3.1	3178258	36	61.6	151	382587079
Redundancy removal and scaffolding (Redundans); REAPR	Mj01muscleDNA_MP14k	Trimmomatic v0.36; NextClip v1.3.1	2842929	36	61.2	151	341695772
Redundancy removal and scaffolding (Redundans); REAPR	Mj01muscleDNA_MP15k	Trimmomatic v0.36; NextClip v1.3.1	2796478	36	61.4	151	335825291
Genome size estimation (GenomeScope2.0); ploidy analysis (SmudgePlot)	Mj01muscleDNA_PE	Fastp v0.20.1	584458822	140	150.5	151	175901294548
Genome size estimation (GenomeScope2.0); ploidy analysis (SmudgePlot)	Mj01spermDNA_PE	Fastp v0.20.1	692322514	140	150.5	151	208366215758
Polishing (HyPo, Pilon)	Mj01muscleDNA_PE	Fastp v0.20.1, Tadpole v38.86	584458822	140	150.5	151	175901294548
Scaffolding (BESST)	Mj01muscleDNA_MP02k	NxTrim v0.4.3-6eb8d5e, Fastp v0.20.1,Bbduk	7793903	60	120.3	149	1871185620
Scaffolding (BESST)	Mj01muscleDNA_MP03k	NxTrim v0.4.3-6eb8d5e, Fastp v0.20.1,Bbduk	6882164	60	120.7	149	1660959082
Scaffolding (BESST)	Mj01muscleDNA_MP04k	NxTrim v0.4.3-6eb8d5e, Fastp v0.20.1,Bbduk	7866181	60	120.5	149	1890980704
Scaffolding (BESST)	Mj01muscleDNA_MP05k	NxTrim v0.4.3-6eb8d5e, Fastp v0.20.1,Bbduk	5649983	60	120.2	149	1360918152
Scaffolding (BESST)	Mj01muscleDNA_MP06k	NxTrim v0.4.3-6eb8d5e, Fastp v0.20.1,Bbduk	7959574	60	120.4	149	1912316953
Scaffolding (BESST)	Mj01muscleDNA_MP07k	NxTrim v0.4.3-6eb8d5e, Fastp v0.20.1,Bbduk	6808782	60	120.1	149	1638901363
Scaffolding (BESST)	Mj01muscleDNA_MP08k	NxTrim v0.4.3-6eb8d5e, Fastp v0.20.1,Bbduk	6586591	60	121	149	1582733976
Scaffolding (BESST); REAPR	Mj01muscleDNA_MP10k	NxTrim v0.4.3-6eb8d5e, Fastp v0.20.1,Bbduk	6777989	60	120.3	149	1629086697
Scaffolding (BESST)	Mj01muscleDNA_MP12k	NxTrim v0.4.3-6eb8d5e, Fastp v0.20.1,Bbduk	7432005	60	120	149	1780336235
Scaffolding (BESST)	Mj01muscleDNA_MP14k	NxTrim v0.4.3-6eb8d5e, Fastp v0.20.1,Bbduk	6529273	60	120	149	1565691970
Scaffolding (BESST)	Mj01muscleDNA_MP15k	NxTrim v0.4.3-6eb8d5e, Fastp v0.20.1,Bbduk	6914928	60	120.1	149	1653978729
Gap filling (TGS-GapCloser); Scaffolding (LRScaf); haplotig removal (purge_haplotigs)	Mj01muscleDNA_ONT	Fastp v0.20.1	2087266	1000	6844.9	190180	14287035057
De novo assembly (Flye)	Mj01muscleDNA_ONT	Fastp v0.20.1	800421	5000	13951.2	190180	11166798742

## Sheet: Table S4
Supplementary Table S4. GenomeScope2.0 analysis results
k-mer size	k=17	k=19	k=21	k=23	k=25	k=27	k=29	k=31	k=33	k=35
Homozygous (aa)	0.977444	0.975269	0.9752	0.993172	0.993403	0.993663	0.99393	0.994176	0.994404	0.994611
Heterozygous (ab)	0.0233651	0.0255135	0.0255924	0.00718074	0.00692747	0.0066506	0.00637022	0.00611187	0.00587283	0.00565558
Genome Haploid Length (bp)	956437107	959093156	957798879	1930605055	1928326122	1924646057	1921524644	1918602484	1916041731	1914172687
Genome Repeat Length (bp)	539946304	388354143	325878180	1400631403	1359413395	1323009084	1291253115	1262772275	1236863970	1213513962
Genome Unique Length (bp)	416490803	570739013	631920699	529973652	568912727	601636973	630271529	655830209	679177761	700658725
Model Fit	0.883891	0.865033	0.862712	0.926539	0.922753	0.919173	0.913812	0.909701	0.905261	0.901189
Read Error Rate	0.00415751	0.00581536	0.0065159	0.00471173	0.0048897	0.00500326	0.00506228	0.00508228	0.0050785	0.00505809

## Sheet: Table S5
Supplementary Table S5: Summary of intermediate genome assemblies
	SPAdes	Redundans	REAPR_04k	REAPR_05k	REAPR_06k	REAPR_07k	REAPR_08k	REAPR_10k	REAPR_12k	REAPR_14k	REAPR_15k	Illumina primary assembly
Number of scaffolds	2164735	136179	165177	169951	160744	160231	157496	153501	151537	150070	150239	22425
Total length (bp)	1604528388	1707098597	1673510311	1662787783	1672035942	1672105190	1676654324	1683597769	1689274893	1693783599	1696212988	1631848511
Longest scaffold (bp)	69176	891704	545260	618566	594459	709837	809766	588706	852759	891704	637592	1414995
N50 (bp)	1432	137424	69944	66954	78188	79824	84215	89779	95423	99177	100833	209993
Gap (%)	0.06617	33.024	31.8185	31.3884	31.75	31.75	31.93	32.21	32.43	32.6	32.6864	34.0354

## Sheet: Table S6
Supplementary Table S6. Summary of the M. japonicus repeat library
Category		Number of elements
DNA transposons	DNA/Academ-1	1
	DNA/CMC-Chapaev-3	2
	DNA/CMC-Transib	1
	DNA/MULE-MuDR	2
	DNA/Merlin	2
	DNA/PIF-Harbinger	16
	DNA/PIF-ISL2EU	1
	DNA/PiggyBac	9
	DNA/TcMar-Fot1	2
	DNA/TcMar-Mariner	1
	DNA/TcMar-Pogo	1
	DNA/TcMar-Tc1	3
	DNA/hAT-Charlie	3
	DNA/hAT-hAT19	2
	DNA/hAT-hATm	10
Retroelements	LINE	16
	LINE/CR1	21
	LINE/CR1-Zenon	10
	LINE/CRE	10
	LINE/Dong-R4	7
	LINE/I	49
	LINE/I-Jockey	70
	LINE/L1	5
	LINE/L1-Tx1	6
	LINE/L2	27
	LINE/Penelope	54
	LINE/RTE	1
	LINE/RTE-BovB	63
	LINE/RTE-RTE	7
	LINE/Rex-Babar	8
	LTR	2
	LTR/Copia	7
	LTR/ERVK	2
	LTR/Gypsy	147
	LTR/Pao	26
Other/DNA_virus		1
Simple_repeat		9
Unknown		3731
Total		4335

## Sheet: Table S7
Supplementary Table S7. Repeat elements identified in the M. japonicus genome
			Number of elements	Length occupied	Percentage of sequence
Retroelements			665015	127067638	0.0745
	SINEs		0	0	0
	Penelope		16508	4531613	0.0027
	LINEs		656768	123316269	0.0723
		CRE/SLACS	330	110763	0.0001
		L2/CR1/Rex	140442	30033623	0.0176
		R1/LOA/Jockey	113641	29855809	0.0175
		R2/R4/NeSL	225992	36348059	0.0213
		RTE/Bov-B	29568	4380101	0.0026
		L1/CIN4	88339	12508808	0.0073
	LTR elements		8247	3751369	0.0022
		BEL/Pao	922	448786	0.0003
		Ty1/Copia	288	85496	0.0001
		Gypsy/DIRS1	6919	3167931	0.0019
		Retroviral	29	10165	0
DNA transposons			6468	1099705	0.0006
		hobo-Activator	619	196714	0.0001
		Tc1-IS630-Pogo	3809	392234	0.0002
		En-Spm	0	0	0
		MuDR-IS905	0	0	0
		PiggyBac	1132	267003	0.0002
		Tourist/Harbinger	464	144738	0.0001
		Other (Mirage, P-element, Transib)	0	0	0
Rolling-circles			0	0	0
Unclassified			1632845	252557143	0.1481
Total interspersed repeats				380724486	0.2233
Small RNA			0	0	0
Satellites			0	0	0
Simple repeats			2387504	467815146	0.2744
Low complexity			347102	45346188	0.0266
Total base masked				893885820	0.5243

## Sheet: Table S8
Supplementary Table S8. Simple repeat contents of arthropod genomes
Species	Reference	Assembly accession no.	Number of scaffolds	Total length (bp)	Gap content %	GC %	Number of elements	Length occupied	Simple repeat %
Marsupenaeus japonicus	This study	GCA_017312705.1	18210	1704994957	0.0210505	34.48	2387504	467815146	0.274379
Penaeus monodon	(Uengwetwanit et al. 2021)	GCF_015228065.1	26876	2394347767	0.164292	36.63	4421863	518203351	0.216428
Litopenaeus vannamei	(Zhang et al. 2019)	GCF_003789085.1	4683	1663581301	0.0273658	36.69	3546663	571191560	0.343351
Fenneropenaeus chinensis	(Yuan et al. 2021)	GCA_016920825.1	8457	1581041647	0.0165375	37.07	3799323	490165238	0.310027
Eriocheir sinensis	N/A	GCA_013436485.1	4311	1272135116	0.000923763	41.96	2243089	174956460	0.13753
Procambarus virginalis	(Gutekunst et al. 2018)	GCA_002838885.1	1942826	3290470695	0.504961	43.26	620201	34284757	0.0104194
Cherax destructor	N/A	GCA_009830355.1	98662	3336744225	6.0337e-05	41.43	1796884	147563431	0.0442238
Cherax quadricarinatus	(Tan et al. 2020)	GCA_009761615.1	508682	3236648033	0.419447	41.08	961391	55714543	0.0172137
Armadillidium nasatum	(Becking et al. 2019)	GCA_009176605.1	25196	1223175971	0.000139971	25.77	2422219	322589574	0.263731
Armadillidium vulgare	(Chebbi et al. 2019)	GCA_004104545.1	43541	1725108002	0.00426689	28.17	3066317	350000951	0.202886
Hyalella azteca	(Poynton et al. 2018)	GCA_000764305.3	18000	550885727	0.00475431	38.47	140061	7589051	0.0137761
Amphibalanus amphitrite	(Kim et al. 2019a)	GCA_009805615.1	2240	613414131	0.00464113	49.81	267446	15982059	0.0260543
Eurytemora affinis	(Eyun et al. 2017)	GCF_000591075.1	6171	389032277	0.00647393	32.47	161660	12069120	0.0310234
Daphnia magna	(Lee et al. 2019)	GCF_003990815.1	4193	122952669	0.0673925	40.54	50466	1773546	0.0144246
Apis mellifera	(Wallberg et al. 2019)	GCF_003254395.2	177	225250884	0.00583178	32.53	237575	10735207	0.0476589
Bombyx mori	(The International Silkworm Genome Consortium 2008)	GCF_000151625.1	43463	481819406	0.103958	37.67	173053	6964502	0.0144546
Drosophila melanogaster	(Larkin et al. 2021)	GCF_000001215.4	1870	143726002	0.0080219	42.01	92179	3936172	0.0273866
