# Supplementary material
Source: publisher figshare collection journal article supplement (https://gsajournals.figshare.com/articles/dataset/_/15043521)
Supplement: Supplementary file 1 [file 1]

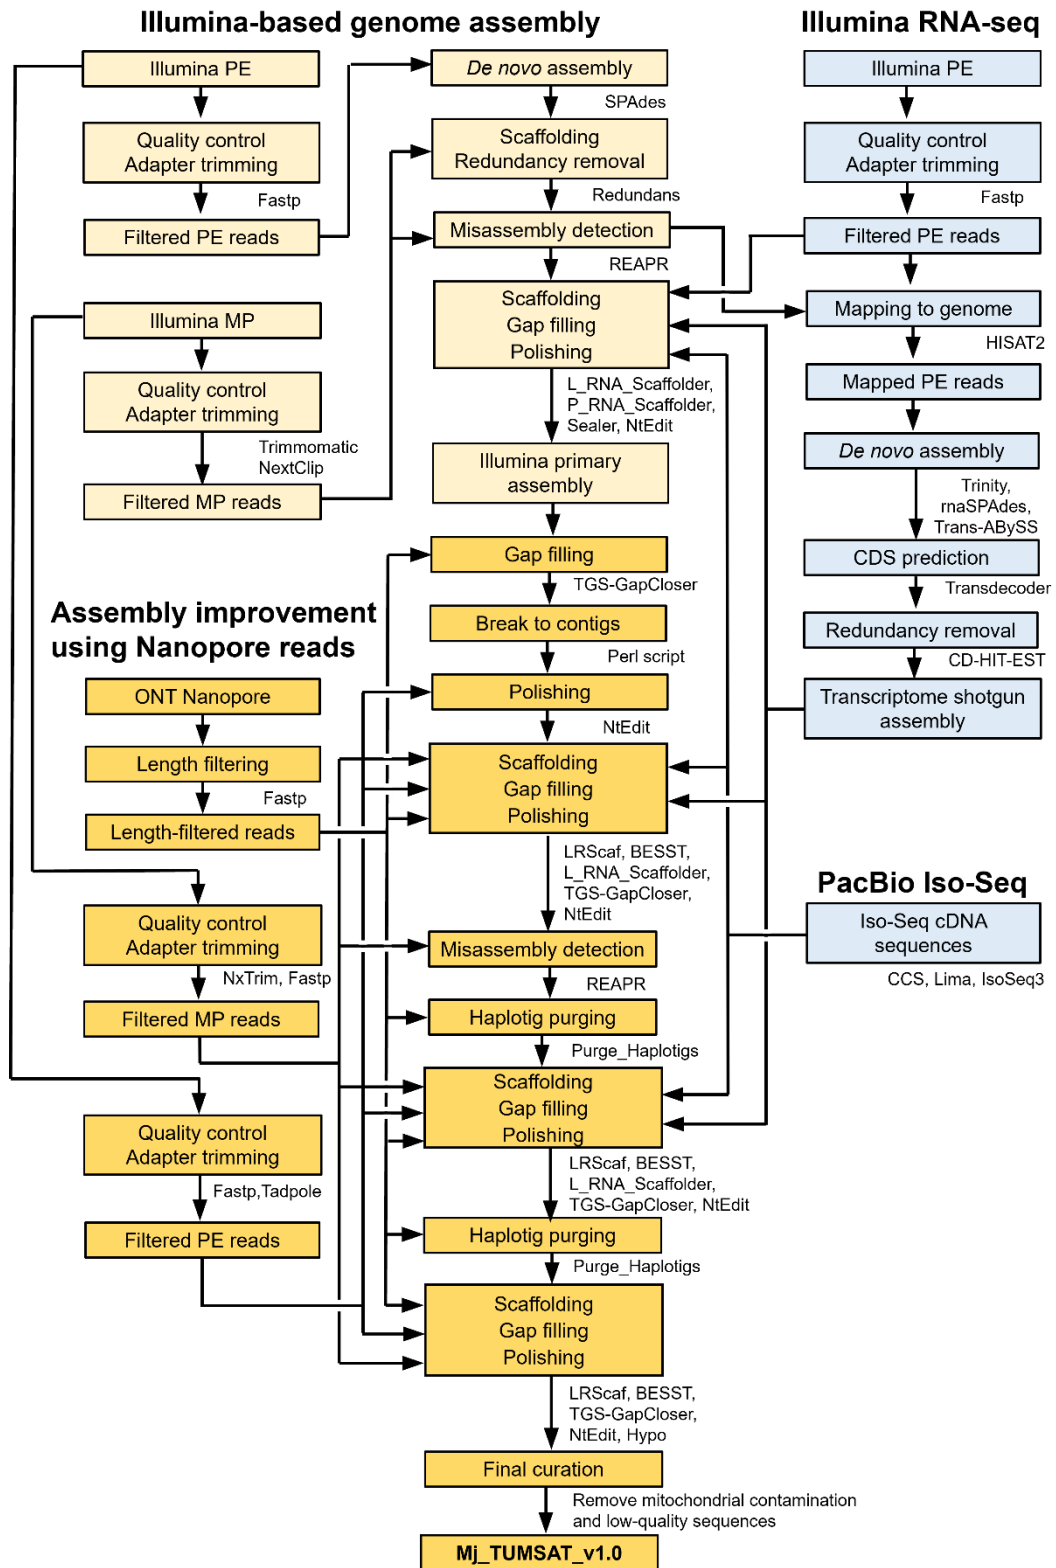

Supplementary Figure S1. *M. japonicus* genome and transcriptome assembly workflow

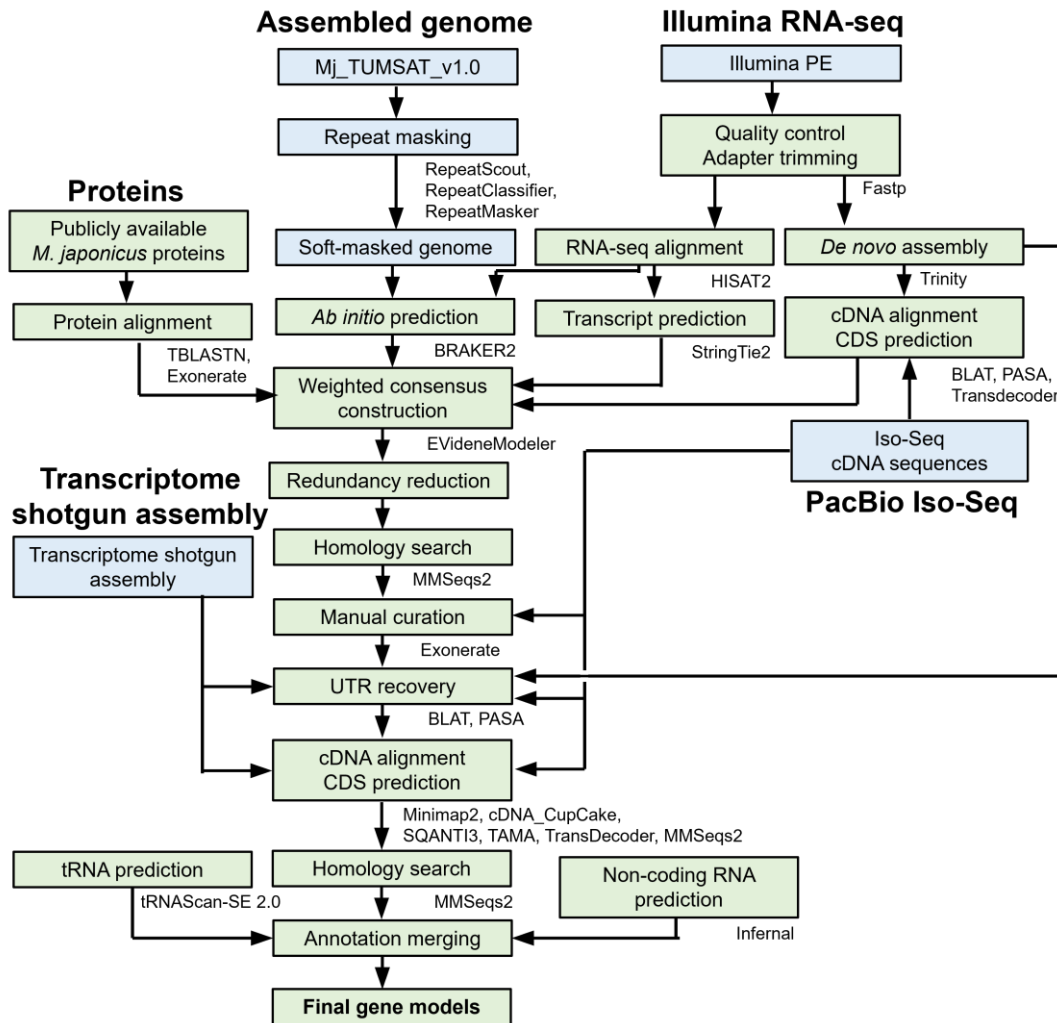

Supplementary Figure S2. *M. japonicus* genome annotation workflow

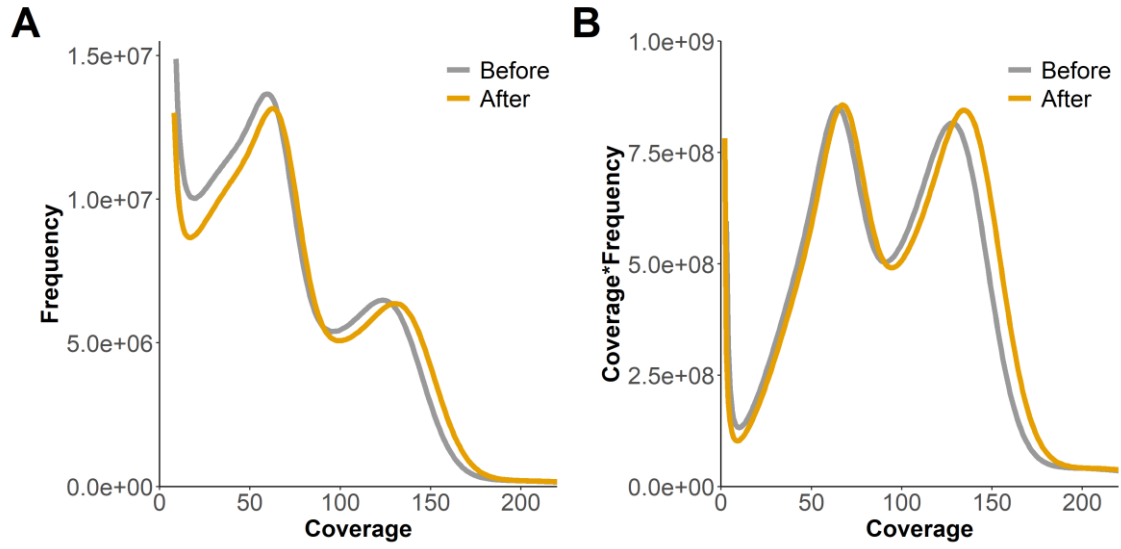

**Supplementary Figure S3. 23-mer distributions of Illumina paired-end reads from the muscle library before and after error-correction by Tadpole**  
(A) Y-axis: Frequency; (B) Y-axis: Coverage\*Frequency.
